# Supplementary material for: Protein quality control and regulated proteolysis in the genome‐reduced organism Mycoplasma pneumoniae
Source: PubMed Central journal article supplement (PMC7737663; doi:10.15252/msb.20209530), 2020-12-15
Supplement: MSB-16-e9530-s001.pdf [file MSB-16-e9530-s001.pdf]

# Appendix

## Table of contents

Appendix Figure S1. Construction of Lon and FtsH conditional mutants in *M. pneumoniae*.

Appendix Figure S2. Growth curve analysis for  $\Delta$ IndLon,  $\Delta$ IndFtsH, and  $\Delta$ IndLon\_FtsH strains.

Appendix Figure S3. Dot blot analysis of cellular DNA replication.

Appendix Figure S4. Volcano plots of the differences in protein abundance between inducing and depleting conditions.

Appendix Figure S5. Volcano plots of the differences in mRNA levels between inducing and depleting conditions.

Appendix Figure S6. Immunoblot analyses of selected Lon and FtsH candidate substrates.

Appendix Figure S7. Immunoblot analyses of selected FtsH candidate substrates.

Appendix Figure S8. Analysis of degron motif properties.

Appendix Figure S9. Sequence alignment of HsdS subunits present in *M. pneumoniae*.

Appendix Figure S10. Mutational analysis to identify Lon degrons in MPN201 (HsdS).

Appendix Figure S11. Mutational analysis to identify Lon degrons in MPN304 (ArcA Nt).

Appendix Figure S12. Correlation between proteome changes in responses to Lon and FtsH depletions.

Appendix Figure S13. Fold change distribution of Lon candidate substrates in Triton X-100 insoluble fractions of cells grown under Lon inducing conditions.

Appendix Figure S14. Transposon mutagenesis screening to identify putative gene mutations suppressing lethality associated with Lon and FtsH depletion.

Appendix Table S1. Mycoplasma strains used in this study.

Appendix Table S2. Gibson cloning strategy for each plasmid constructed in this study.

Appendix Table S3. Primers used in this study.

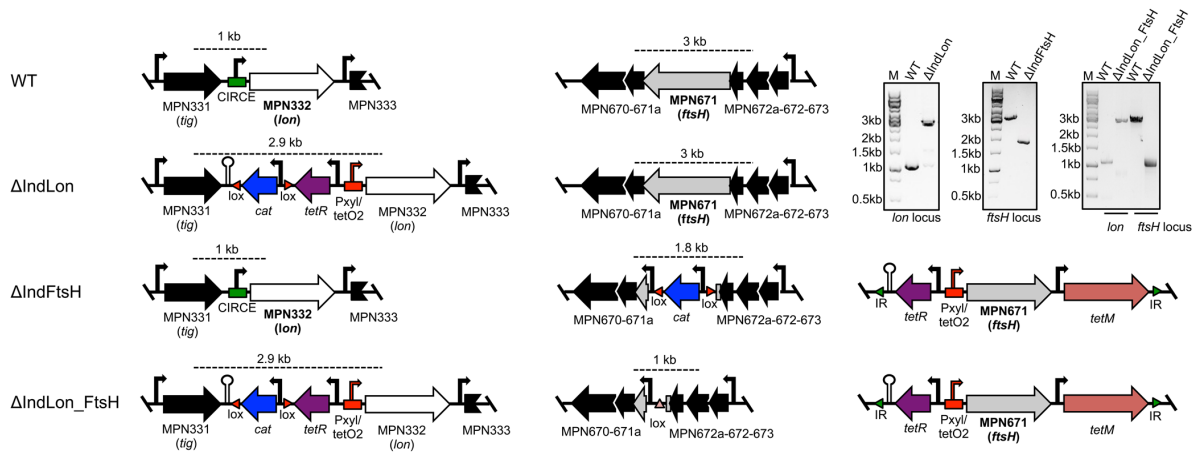

**Appendix Figure S1. Construction of Lon and FtsH conditional mutants in *M. pneumoniae*.**

Schematic representation of the genetic architecture after genome edition of  $\Delta$ IndLon,  $\Delta$ IndFtsH and  $\Delta$ IndLon\_FtsH conditional mutants as compared to the wild-type (WT) strain. The DNA rearrangement in the *lon* and *ftsH* locus is shown for each strain. The *ftsH* inducible platform inserted by transposon delivery is also shown for  $\Delta$ IndFtsH and  $\Delta$ IndLon\_FtsH strains. The PxyI/tetO2 inducible promoter is highlighted with a red bent arrow and the terminator sequence used to isolate the promoter is represented by a hairpin structure. The *tetR* repressor gene and the resistance markers *cat* and *tetM* are indicated in purple, blue and red, respectively. The CIRCE regulatory element replaced by the *lon* inducible platform is shown in green. Agarose electrophoresis gels showing the PCR screening confirmed the intended genome rearrangements at the *lon* and *ftsH* locus (top right panel). The PCR products and expected sizes for each strain are shown in the scheme.

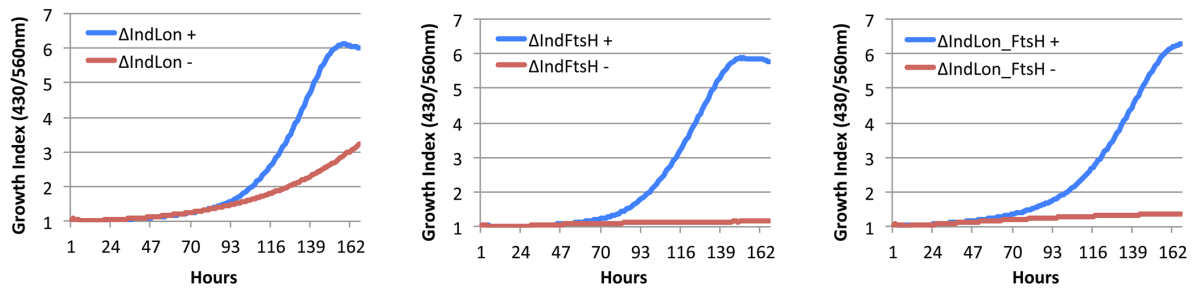

**Appendix Figure S2.** Growth curve analysis for  $\Delta$ IndLon,  $\Delta$ IndFtsH, and  $\Delta$ IndLon\_FtsH strains grown under inducing (+) or depleting (-) conditions as determined by the 430/560 absorbance rate index that shows pH changes in the medium.

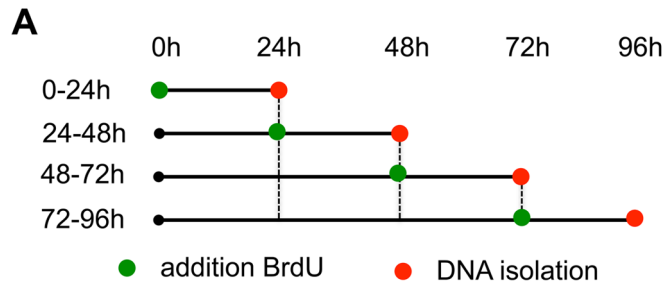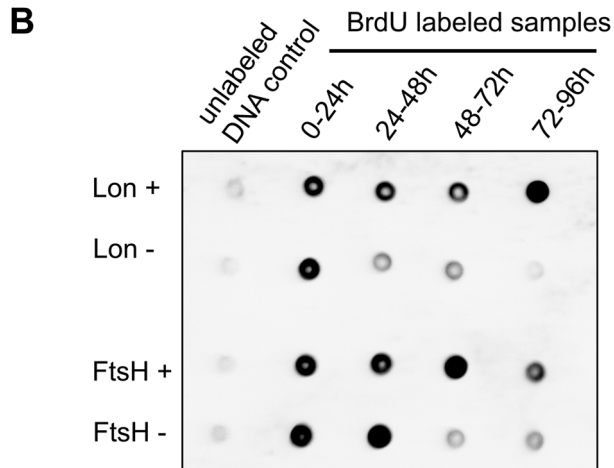

**Appendix Figure S3. Dot blot analysis of cellular DNA replication.**

(A).  $\Delta$ IndLon and  $\Delta$ IndFtsH strains grown under inducing (+) or depleting (-) conditions were incubated with 100 $\mu$ M BrdU during 24h at different interval time points across the growth curve. After BrdU labeling, BrdU pulse-labeled cells were collected and total DNA extracted.

(B). Dot blot DNA hybridization analysis of BrdU labeled samples indicated in panel A. A DNA unlabeled control was also included. A total of 100 ng of DNA was denatured and spotted on a Hybond-N+ membrane. Following UV cross-linking, labeled DNA was visualized using an anti-BrdU antibody. BrdU incorporation was reduced after 24h and 48h of depletion of Lon and FtsH, respectively. A representative experiment is shown.



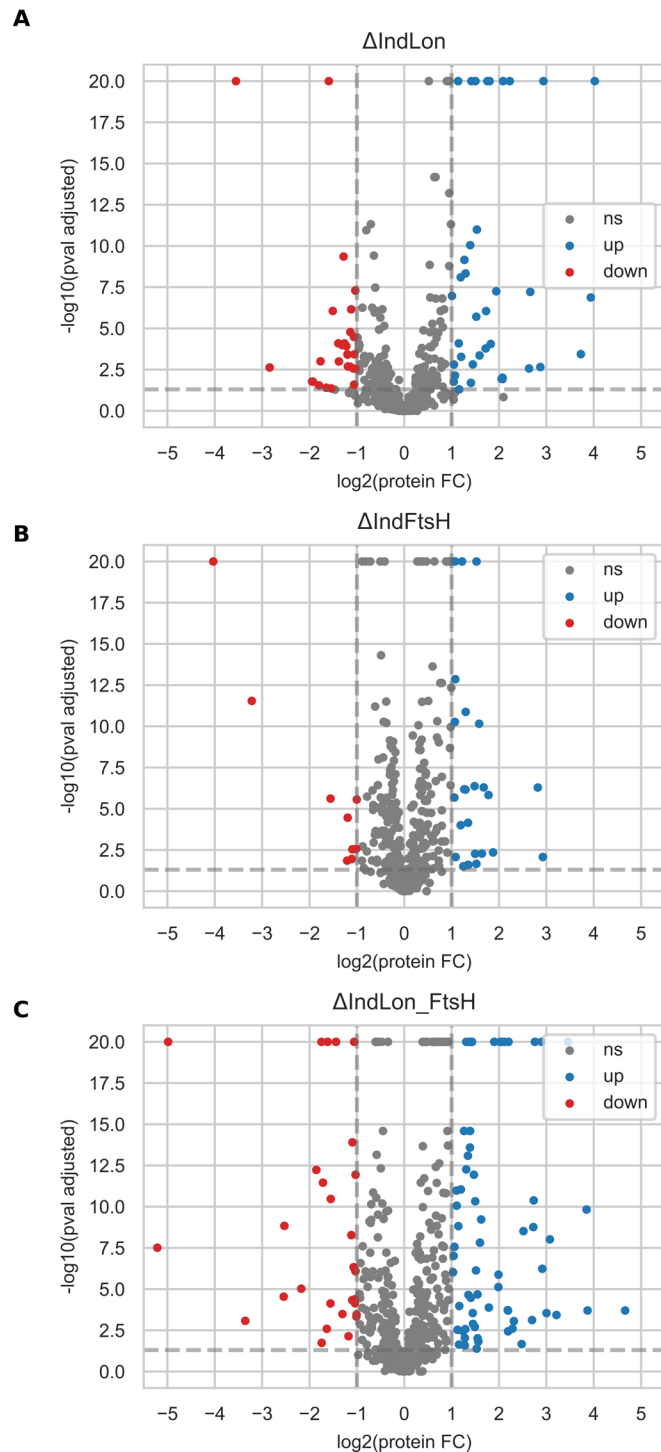

**Appendix Figure S4. Volcano plots of the differences in protein abundance between inducing and depleting conditions.** Differences in protein abundance between inducing (+) and depleting (–) conditions (48h and 72h of depletion for Lon and FtsH, respectively) are reported as  $\log_2$  of fold-changes for conditional mutants  $\Delta\text{IndLon}$  (**A**),  $\Delta\text{IndFtsH}$  (**B**) and  $\Delta\text{IndLon\_FtsH}$  (**C**). Statistical significance, calculated following a peptide-based statistical method, is reported as  $-\log_{10}$  of the adjusted p-value after multiple tests correction. Significantly regulated proteins were defined based on a false discovery rate (FDR) of 5% (dashed horizontal line) and a minimum fold change cut-off of 2 (dashed vertical lines). For better visualization, very small p-values were clipped at  $1 \times 10^{-20}$ .

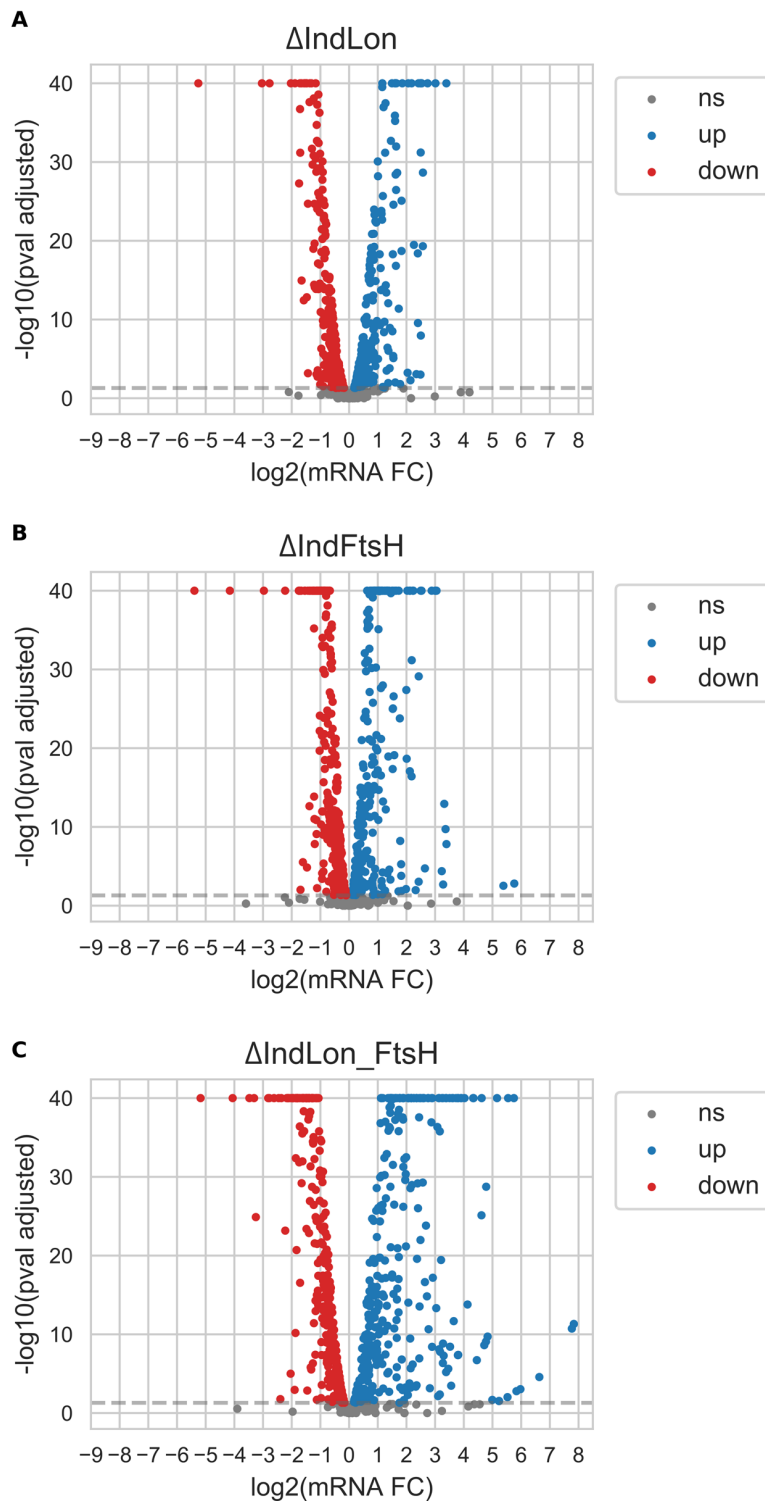

**Appendix Figure S5. Volcano plots of the differences in mRNA levels between inducing and depleting conditions.** Differences in mRNA levels between inducing (+) and depleting (–) conditions (48h and 72h of depletion for Lon and FtsH, respectively) are reported as  $\log_2$  of fold changes for conditional mutants  $\Delta\text{IndLon}$  (A),  $\Delta\text{IndFtsH}$  (B) and  $\Delta\text{IndLon\_FtsH}$  (C). Statistical significance is reported as  $-\log_{10}$  of the adjusted p-value after multiple tests correction. Significantly regulated genes were defined based on a false discovery rate (FDR) of 5% (dashed horizontal line). For better visualization, very small p-value were clipped at  $1 \times 10^{-40}$ .

## A Lon substrates

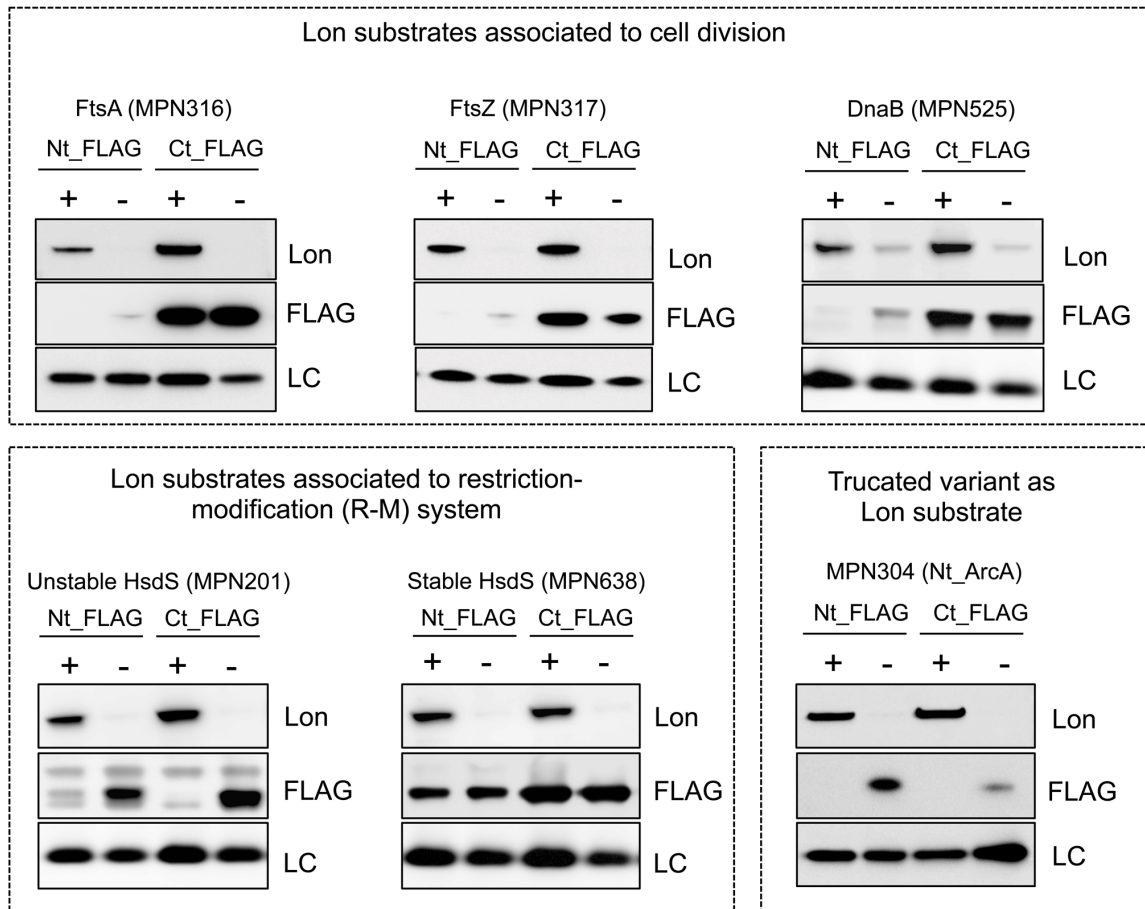

## B FtsH substrates

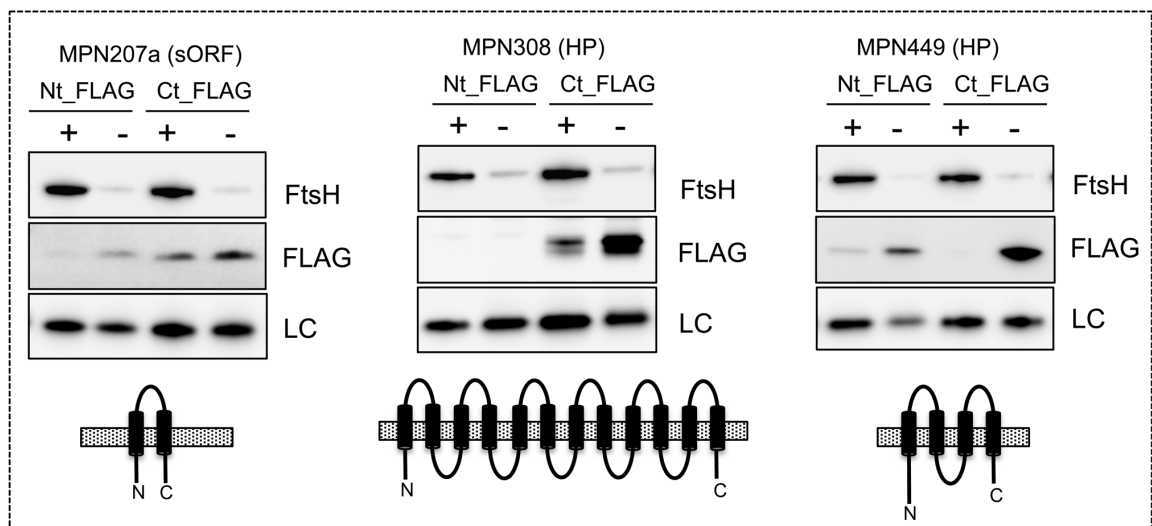

**Appendix Figure S6. Immunoblot analyses of selected Lon and FtsH candidate substrates.**

(A) Lon candidate substrates. (Upper panel) N- and C-terminal FLAG-tagged derivatives of candidate substrates associated to cell division, including FtsA (MPN316), FtsZ (MPN317) and DnaB (MPN525) were expressed in the  $\Delta$ IndLon mutant. Protein levels of Lon and candidate

substrates were then assessed by immunoblot under inducing (+) or depleting (-) conditions (48h of depletion) using anti-Lon and anti-FLAG antibodies. LC, loading control.

**(Lower, left panel)** Similar to the upper panel A, but for candidate substrates associated to the R-M system. Protein expression assessed by immunoblot of FLAG-tagged derivatives of MPN201 and MPN638 are shown as representatives of unstable and stable HsdS subunits, respectively. **(Lower,**

**right panel)** Similar to the upper panel A, but showing an example of a truncated variant as a Lon candidate substrate. Specifically, protein expression assessed by immunoblot of FLAG-tagged derivatives of MPN304 (ArcA-Nt) that encodes the N-terminal fragment of an ArcA truncated variant is shown.

**(B)** FtsH candidate substrates. N- and C-terminal FLAG-tagged derivatives of MPN207a, MPN308 and MPN449 were expressed in the  $\Delta$ IndFtsH mutant. Protein levels of FtsH and candidate substrates were then assessed by immunoblot under inducing (+) or depleting (-) conditions (72h of depletion) using anti-FtsH and anti-FLAG antibodies. For each protein, a schematic representation of the predicted transmembrane domains is also shown below.

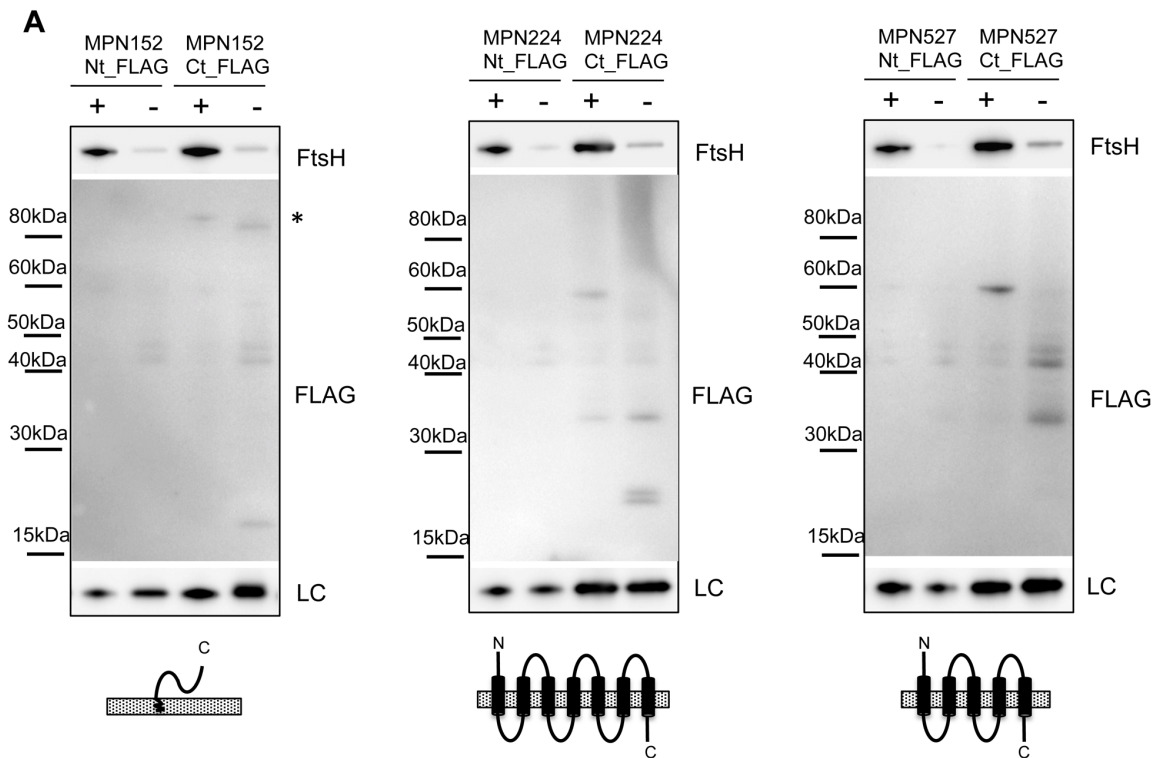

**B**

| Candidate | copies / cell      |                    | Signal peptide | Annotation           | Predicted size |
|-----------|--------------------|--------------------|----------------|----------------------|----------------|
|           | $\Delta$ IndFtsH + | $\Delta$ IndFtsH - |                |                      |                |
| MPN152    | 6                  | 26                 | lipobox        | lipoprotein          | 87.3 kDa       |
| MPN207a   | 0                  | 343                | No             | sORF                 | 10.8 kDa       |
| MPN224    | 48                 | 107                | No             | lgt                  | 42.8 kDa       |
| MPN308    | 53                 | 108                | No             | polyamine antiporter | 62.1 kDa       |
| MPN449    | 58                 | 223                | No             | hypothetical protein | 49.2 kDa       |
| MPN527    | 0                  | 15                 | No             | hypothetical protein | 24.7 kDa       |

**Appendix Figure S7. Immunoblot analyses of selected FtsH candidate substrates.**

**(A).** N- and C-terminal FLAG-tagged derivatives of candidate substrates were expressed in the  $\Delta$ IndFtsH mutant (see also Fig. 4). Protein levels of FtsH and the candidate substrates were then assessed by immunoblot analysis during inducing (+) or depleting (-) conditions (72h of depletion) using anti-FtsH and anti-FLAG antibodies. LC, loading control. The asterisk indicates the predicted position of the detected protein. For each protein, a schematic representation of the predicted transmembrane domains is also shown below.

**(B).** Protein features and estimated protein copy numbers of selected FtsH candidate substrates of  $\Delta$ IndFtsH mutant grown in inducing (+) or depleting (-) conditions.

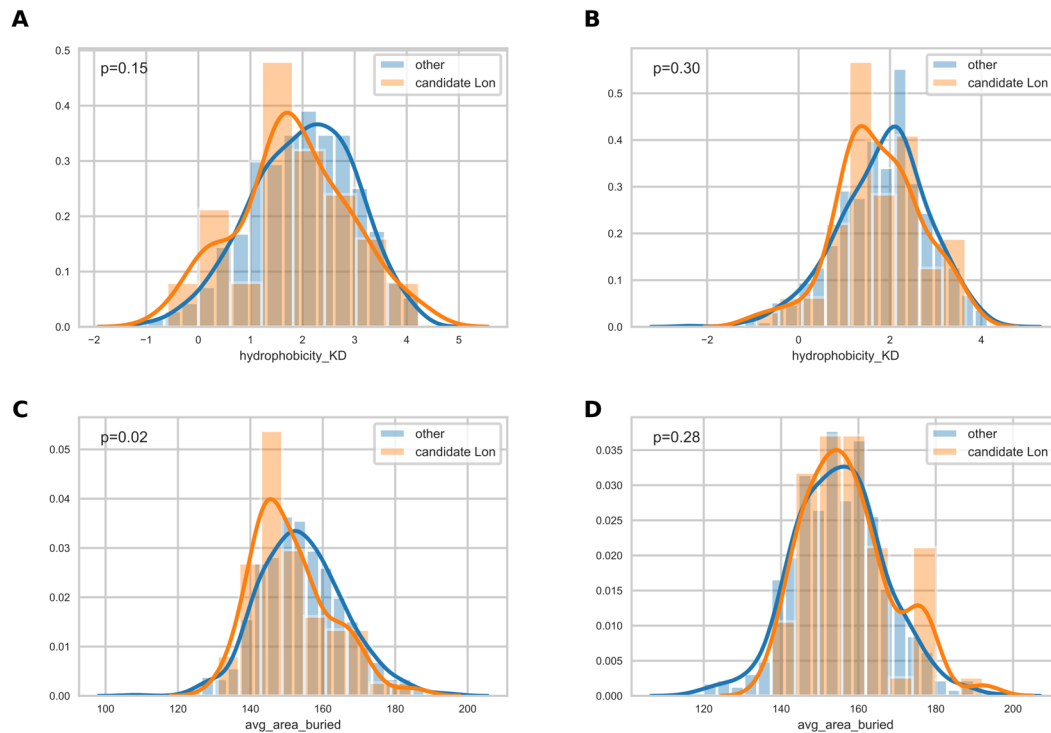

### Appendix Figure S8. Analysis of degron motif properties.

Protein sequences at N- (panels **A** and **C**) and C-termini (panels **B** and **D**) of Lon candidate substrates were analyzed for putative signal in amino acid properties, as for example enrichment of hydrophobic region (panels A and B, Kyte-Doolittle hydrophobicity scale) and the average buried area (panels C and D). The terminus region of protein sequence was selected (25 residues). The average amino acid property score was computed over a rolling window of size 5. The maximum score was selected as representative of the most extreme signal in the terminus score. Distribution of the maximum score for substrate proteins did not show any significant difference (M.W.W. two-sided test) when compared to the background proteins (neither substrate of Lon nor of FtsH). A similar analysis of the average score over the last (first) 5 or 10 amino acids of protein sequences did not yield any significant enrichment.

```

MPN638 1 MT---PPLKLNSTNSWTKTIGSIFELKKGEMIKREL--APDKKVEYNGEKASGRTRNEPTEK---NTSIIIGSSCEYVRLADKDYECQSSCETTVI--D-PLEIDLKPAYVALSQE
Ec_HsdS 1 MSELISLLEKFLDGVEMWLPGEVSAIRGRVMSKCYITBNFGEPVYVSSCANNNGRIGSINTEDFDGEYSWTTDGANAGVVFYRNGKFSITNVCGLLTIKRYSTIYKFLRYMLTFA
MPN507 1 -----MCHITKYIKIDICDIQRGRITIKRYIKNNSKYPVYSAAITNNGRIGFINVYDAGEYVVTWTTNG--YAGVVFYRNGKFSASDCGLKVKVKNKE--INAKFLAFLSRT
MPN089 1 -----MEIKTYIKIDICDASHGRENTRYLRBNQGYVYVSSATNNGEMGRIGIYDFDGEYVVTWRWSYAGSIYRNGKFSASNCGLLKVKVKNKE--INPKFLAYALKEA
MPN201 1 -----MEIKTYIKIDICDIQRGRVSKLDLKKDPCGVVYVSSAANNNDGEGRINSYDFDGEYVVTWTTDGCYAGVVFYRNGKFSITNVCGLLKVKVKNKE--ISKWLAHILKLEA
MPN285 1 -----MEIKTYIKIDICDIQRGRVSKLDLKKDPCGVVYVSSAANNNDGEGRINSYDFDGEYVVTWTTDGCYAGVVFYRNGKFSITNVCGLLKVKVKNKE--ISKWLAHILKLEA
MPN289 1 -----MEIKTYIKIDICDIQRGRVSKLDLKKDPCGVVYVSSAANNNDGEGRINSYDFDGEYVVTWTTDGCYAGVVFYRNGKFSITNVCGLLKVKVKNKE--ISKWLAHILKLEA
MPN615 1 -----MLIKRIRKIDICDIQRGRVSKLDLKKDPCGVVYVSSAANNNDGEGRINSYDFDGEYVVTWTTDGCYAGVVFYRNGKFSITNVCGLLKVKVKNKE--INPKFLAYALKEA
MPN343 1 -----MCHITKYIKIDICDIQRGRVSKLDLKKDPCGVVYVSSAANNNDGEGRINSYDFDGEYVVTWTTDGCYAGVVFYRNGKFSITNVCGLLKVKVKNKE--ISKWLAHILKLEA
MPN365 1 -----MEIKTYIKIDICDIQRGRVSKLDLKKDPCGVVYVSSAANNNDGEGRINSYDFDGEYVVTWTTDGCYAGVVFYRNGKFSITNVCGLLKVKVKNKE--ISKWLAHILKLEA

MPN638 113 EKRTISLISGTTIKNRLSDIKQIFPLVVK-----SQQDRTTAHALSVDLRIEHNELI-----ENNRKLRLE
Ec_HsdS 121 KRFVYSQM--GNPKMSHQENIPPIPCPNPEKSLAQCEVRLDITSAIAP-----LAEINMR
MPN507 106 PCFVHNLG--SRPKNRKVAEISLDFDPE-----LQIQEKIAHFKSINELSCSI-----RAELIRK
MPN089 107 KRFVNTS--ALFTRTQKVEIPDFDPE-----LQIQEKIATILDTELSAELSAE--SAE-----LSAELSAELRER
MPN201 106 PKFTNRVF--KNRPKLTHRTMAEIPDFDPE-----LQIQEKIATILDTELSAELSAE--SAE-----LSAELSAELRER
MPN285 106 PKFTNRVF--KNRPKLTHRTMAEIPDFDPE-----LQIQEKIATILDTELSAELSAE--SAELSAELSAELSAELSAELSAE---LSAELSAELSAELSAELSAELSAELRER
MPN289 107 PKFVNNAC--PIPKMQGTIAEISLDFDTS-----KKIQEKIATILDTELSAELSAE--S-----AELSAELRER
MPN615 107 PKFVNNAC--PIPKMQGTIAEISLDFDPE-----LQIQEKIATILDTELSAELSAE--S-----AELRER
MPN343 107 PKFVNNAC--PIPNLNRTEIEISLDFDPE-----LQIQEKIATILDTELSAELSAE--SAELSAELSAELSAELSAELSAELSAELSAELSAELSAELSAELSAELSAELRER
MPN365 106 PKFVNNAC--PIENITLKRREIEISLDFDPE-----KKIQEKIATILDTELSAELSAE--S-----AELRER

MPN638 177 YAKRLTLDLDFEITHW--NHEI-----HEQMGELISGCVFHL--SKYK--ADERFEDCKEYVCAIESTSFV--NPNTKKTI--MIANGYSIGNRVTHTIPVNGTGGI
Ec_HsdS 183 --KKOYNNYRDCILSFDDEQEKPIVLEKLLDGEVWLPGEVSA--LRGGRVYKRY--TENCPVYVSSCANNNGKFSINTEDFDGEYSWTTDGANAGVVFYRNGKFSITNVCGLLTIKRYSTIYKFLRYMLTFA--VCC
MPN507 161 --KKOYAFYSDYLLPKHSQ-----GEEKLIRKDIARLLVCEKPSDQKEDVYKPI--INSRKAQDFLGYKTFRIAEKSIIVYARCT--IAVYRDFSLPAV---S
MPN089 174 --KKOYAFYRDYLLNQNIRKI--NHEE--N--KYY-----KIGTAQKLVLVCEKPADSKENVEYKPHL--SNRKAQDFLGYKTFRIAEKSIIVYARCT--IAVYRDFSLPAV---S
MPN201 154 --KKOYAFYRDYLLNQNIRKI--Y--GANIPFETFQVKDICE--IRRGRATIKAVI--RNNPGENPVYSAATTNDGELGRIKDCDFDGEYITWTTNGY--AGVVFYRNGKFNASC--DCG
MPN285 214 --KKOYAFYRDYLLNQNIRKI--Y--GANIPFETFQVKDICE--IRRGRATIKAVI--RNNPGENPVYSAATTNDGELGRIKDCDFDGEYITWTTNGY--AGVVFYRNGKFNASC--DCG
MPN289 170 --KKOYAFYSDYLLNQRNMI-----GANIPFETFQVKDICE--IRRGRATIKAVI--RNNPGENPVYSAATTNDGELGRIKDCDFDGEYITWTTNGY--AGVVFYRNGKFNASC--DCG
MPN615 158 --KKOYAFYRDYLLNQNIRKI--Y--GANIPFETFQVKDICE--IRRGRATIKAVI--RNNPGENPVYSAATTNDGELGRIKDCDFDGEYITWTTNGY--AGVVFYRNGKFNASC--DCG
MPN343 218 --KKOYAFYRDYLLNQNIRKI--Y--GANIPFETFQVKDICE--IRRGRATIKAVI--RNNPGENPVYSAATTNDGELGRIKDCDFDGEYITWTTNGY--AGVVFYRNGKFNASC--DCG
MPN365 157 --KKOYAFYRDYLLNQNIRKI--Y--GANIPFETFQVKDICE--IRRGRATIKAVI--RNNPGENPVYSAATTNDGELGRIKDCDFDGEYITWTTNGY--AGVVFYRNGKFNASC--DCG

MPN638 280 YEAKRPNITVYVPCYCA--LYMQKDLRERFKRDESFFISKTAGETKVPV-----KSFATQKACKIYLLDRTLECKEBAKSIISIRDNILGKL---EPTIS-----
Ec_HsdS 297 LITIKSKYSIVKFLFWLLEAK--KHVYSGMGNPKLMSHQENIPVPCPNPEKSLAQCEVRLDITSAIAP-----LAEINMR
MPN507 264 LITCFIKPEFNINIFPH--ARAT--KFKKGGSGTGQLVAQFKPYOYIPE-----SLKKQELAATLDPLYVIFANSNNGIYKIEIIRKKQYCYERLEFQWLENQKV-----
MPN089 276 LITCFVKEEFDIIFPH--ARAT--KFKKGGSATGQLVAQFKPYOYIPE-----SLKKQELAATLDPLYVIFANSNNGIYKIEIIRKKQYCYERLEFQWLENQKV-----
MPN201 261 MLRVKNNK--CQKFSILLIEAT--KVVHNLASRPKLSQKVAEISLDFDPE-----PLEIQEKIADILAFKELCNDIEGIPAEIIRKKQYCYERLEFQWLENQKV-----
MPN285 322 MLRVKNNK--CQKFSILLIEAT--KVVHNLASRPKLSQKVAEISLDFDPE-----PLEIQEKIADILAFKELCNDIEGIPAEIIRKKQYCYERLEFQWLENQKV-----
MPN289 -----
MPN615 265 MLRVKNNK--CQKFSILLIEAT--KVVHNLASRPKLSQKVAEISLDFDPE-----PLEIQEKIADILAFKELCNDIEGIPAEIIRKKQYCYERLEFQWLENQKV-----
MPN343 325 MLRVKNNK--CQKFSILLIEAT--KVVHNLASRPKLSQKVAEISLDFDPE-----PLEIQEKIADILAFKELCNDIEGIPAEIIRKKQYCYERLEFQWLENQKV-----
MPN365 264 MLRVKNNK--CQKFSILLIEAT--KVVHNLASRPKLSQKVAEISLDFDPE-----PLEIQEKIADILAFKELCNDIEGIPAEIIRKKQYCYERLEFQWLENQKV-----

```

**Appendix Figure S9. Sequence alignment of HsdS subunits present in *M. pneumoniae* compared to *E. coli* HsdS (WP\_096840861.1).** The structure of the orthologous protein of MPN638 (HsdS) in *M. genitalium* (MG438) has been solved (PDB identifier: 1YDX). The protein sequence of MPN638 differs from the other HsdS subunits, although it is similar to other HsdS at the structural level (Calisto et al., 2005).

Calisto BM, Pich OQ, Piñol J, Fita I, Querol E & Carpena X (2005) Crystal structure of a putative type I restriction-modification S subunit from *Mycoplasmata genitalium*. *J. Mol. Biol.* 351: 749–762

**A**

```

>MPN201
MEIKTYKIKDICDITRGRVISKLDIKKDPGVFPVVSAAATNDGEFGRINSYDFDGEYVTWTADGYGGAVFYRNGKFSITNLCGLLKVKNKEISSKYLAHIL
KLEAPKFTNRVFKNRPKLTHKTMAEIPIDFPPLKIQEKIATILDTFTELRRKKQYAFYRDYLLNQENIRKIYGANIPFETFQVKDICEIRRGRAITKAYI
RNNPGENPVYSAATTNDGELGHIKDCDFDGEYITWTTNGYAGVVFYRNGKFNASQDCGVLKVKNKKICTKFLSLLEIEATKFVHNLASRPKLSQKVMAEI
ELSFPPLEIQEKIADILCAFEKLCNDLVEGIPAEIELRKKQLDYQNFLFNWVQKIRN

>MPN201mut1 (CtMPN638)
MEIKTYKIKDICDITRGRVISKLDIKKDPGVFPVVSAAATNDGEFGRINSYDFDGEYVTWTADGYGGAVFYRNGKFSITNLCGLLKVKNKEISSKYLAHIL
KLEAPKFTNRVFKNRPKLTHKTMAEIPIDFPPLKIQEKIATILDTFTELRRKKQYAFYRDYLLNQENIRKIYGANIPFETFQVKDICEIRRGRAITKAYI
RNNPGENPVYSAATTNDGELGHIKDCDFDGEYITWTTNGYAGVVFYRNGKFNASQDCGVLKVKNKKICTKFLSLLEIEATKFVHNLASRPKLSQKVMAEI
ELSFPPLEIQEKIADILCAFEKLCNDLVEGIPAEIELRKKQLDSIRDNLLGKLFPTLS

>MPN201mut2
MEGKTDKKGKDCGCDGTRGRVISKLDIKKDPGVFPVVSAAATNDGEFGRINSYDFDGEYVTWTADGYGGAVFYRNGKFSITNLCGLLKVKNKEISSKYLAHIL
KLEAPKFTNRVFKNRPKLTHKTMAEIPIDFPPLKIQEKIATILDTFTELRRKKQYAFYRDYLLNQENIRKIYGANIPFETFQVKDICEIRRGRAITKAYI
RNNPGENPVYSAATTNDGELGHIKDCDFDGEYITWTTNGYAGVVFYRNGKFNASQDCGVLKVKNKKICTKFLSLLEIEATKFVHNLASRPKLSQKVMAEI
ELSFPPLEIQEKIADILCAFEKLCNDLVEGIPAEIELRKKQLDYQNFLFNWVQKIRN

>MPN201mut3
MEIKTYKIKDICDITRGRVISKLDIKKDPGDPDGSAATNDGEFGRINSYDFDGEYVTWTADGYGGAVFYRNGKFSITNLCGLLKVKNKEISSKYLAHIL
KLEAPKFTNRVFKNRPKLTHKTMAEIPIDFPPLKIQEKIATILDTFTELRRKKQYAFYRDYLLNQENIRKIYGANIPFETFQVKDICEIRRGRAITKAYI
RNNPGENPVYSAATTNDGELGHIKDCDFDGEYITWTTNGYAGVVFYRNGKFNASQDCGVLKVKNKKICTKFLSLLEIEATKFVHNLASRPKLSQKVMAEI
ELSFPPLEIQEKIADILCAFEKLCNDLVEGIPAEIELRKKQLDYQNFLFNWVQKIRN

>MPN201mut4
MEIKTYKIKDICDITRGRVISKLDIKKDPGVFPVVSAAATNDGEFGRINSGDGDEDGTDTADGYGGAVFYRNGKFSITNLCGLLKVKNKEISSKYLAHIL
KLEAPKFTNRVFKNRPKLTHKTMAEIPIDFPPLKIQEKIATILDTFTELRRKKQYAFYRDYLLNQENIRKIYGANIPFETFQVKDICEIRRGRAITKAYI
RNNPGENPVYSAATTNDGELGHIKDCDFDGEYITWTTNGYAGVVFYRNGKFNASQDCGVLKVKNKKICTKFLSLLEIEATKFVHNLASRPKLSQKVMAEI
ELSFPPLEIQEKIADILCAFEKLCNDLVEGIPAEIELRKKQLDYQNFLFNWVQKIRN

```

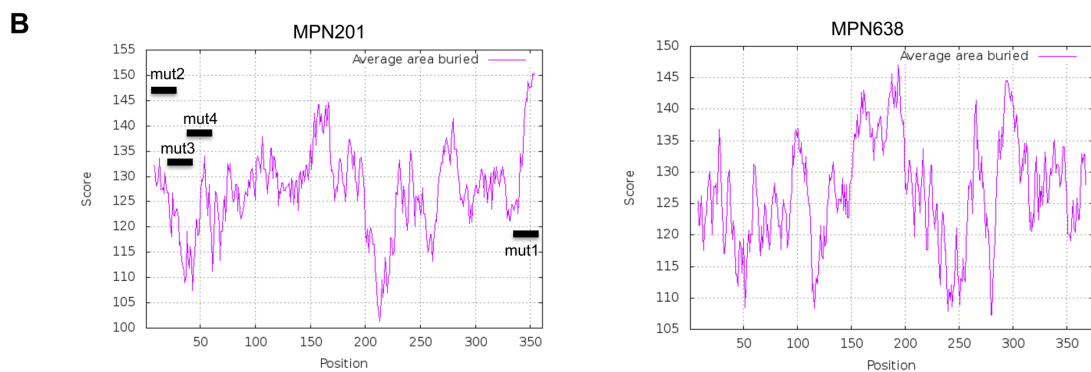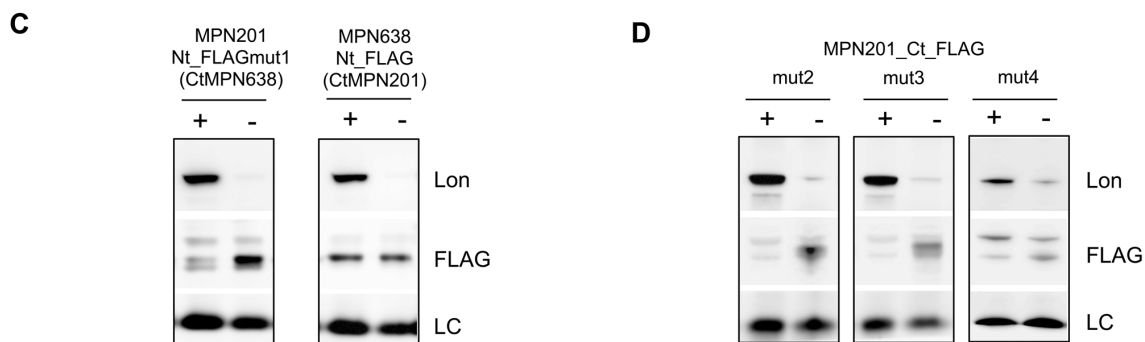

**Appendix Figure S10. Mutational analysis to identify Lon degrons in MPN201 (HsdS).**

(A) Amino acid sequence of MPN201 and their mutant derivatives. Hydrophobic motifs that can potentially act as Lon degrons are highlighted in bold. Mutations performed in these putative Lon degrons are shown in red.

(B) Sequence analysis showing the surface-area burial score along MPN201 (HsdS) and MPN638 (HsdS) protein sequence. Analysis was performed using the ProtScale Tool selecting the “average area buried” amino acid scale (Gasteiger et al, 2005). Mutated regions in MPN201 are indicated in the plot.



**(C)** Protein stability assessment of MPN201 and MPN638 N-terminal FLAG-tagged derivatives in which their C-terminal regions were swapped and expressed in the  $\Delta$ IndLon mutant. Protein levels were then determined by immunoblot using anti-Lon and anti-FLAG antibodies comparing inducing (+) or depleting (–) conditions (48h of depletion). LC, loading control.

**(D)** Protein stability assessment of MPN201 containing mutations in putative Lon degrons. C-terminal FLAG-tagged derivatives with mutations shown in panel A were expressed in the  $\Delta$ IndLon mutant and protein levels determined by immunoblot as in panel C.

We hypothesized that the C-terminal hydrophobic motif YYQNFLFNWV could be responsible for Lon-mediated degradation, as this motif is mainly conserved in the unstable HsdS, but absent from MPN638 (Appendix Figure S9). To test this, we swapped the C-terminal regions of MPN201 and MPN638 and we assessed the stability of these proteins in the presence of Lon. We found that MPN201 was still degraded, whereas MPN638 remained stable (Appendix Figure S10C). We then searched for sequence motifs in MPN201 with a high score for buried surface-area, as these regions have been shown to correlate well in *E. coli* with Lon-dependent degradation (Gur & Sauer, 2008). As the N-terminal FLAG fusion slightly improved the stability of MPN201 (Appendix Figure S6), we focused particularly on motifs present in the N-terminal region. However, after several mutational analyses in candidate motifs, we were unable to identify a clear degradation signal in MPN201 (Appendix Figure S10D), suggesting the existence of multiple exposed degrons.

Gasteiger E., Hoogland C., Gattiker A., Duvaud S., Wilkins M.R., Appel R.D., Bairoch A.; *Protein Identification and Analysis Tools on the ExPASy Server*; (In) John M. Walker (ed): The Proteomics Protocols Handbook, Humana Press (2005). pp. 571-607

**A**

MPN304                    --LPTTPIIAARKFTLNQLTWAQLR**VVIFLYM**TNKQ**WWWGWV**NGQP**KLPLMF**  
 MPN304mut1            --LPTTPIIAARKFTLNQLTWAQLR**DGIDGM**TNKQ**WWWGWV**NGQP**KLPLMF**  
 MPN304mut2            --LPTTPIIAARKFTLNQLTWAQLR**VVIFLYM**TNKQ**DGDGDG**NGQP**KLPLMF**  
 MPN304mut3            --LPTTPIIAARKFTLNQLTWAQLR**VVIFLYM**TNKQ**WWWGWV**NGQP**KDPDGD**

**B**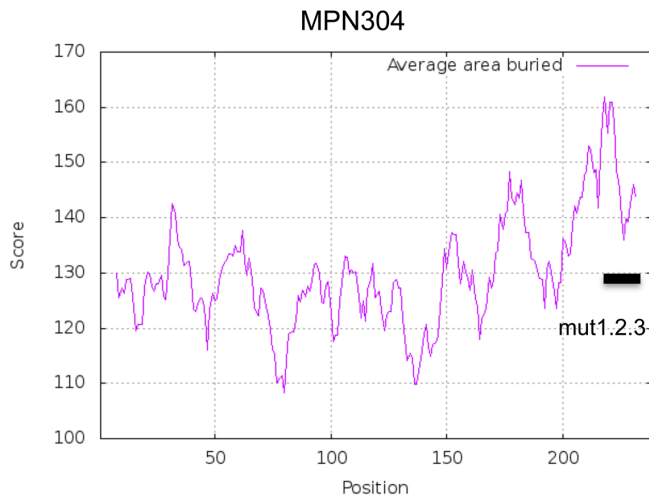**C**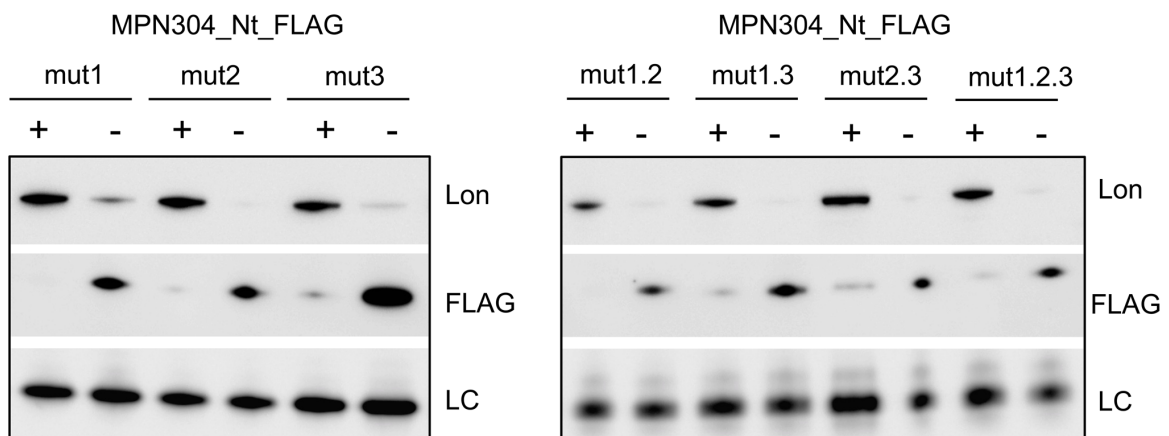

**Appendix Figure S11. Mutational analysis to identify Lon degrons in MPN304 (ArcA Nt).**

**(A)** Amino acid sequence of the last 50 residues of MPN304 and their mutant derivatives.

Hydrophobic motifs that can potentially act as Lon degrons are highlighted in bold. Mutations performed in these putative Lon degrons are shown in red.

**(B)** Sequence analysis showing the surface-area burial score along MPN304 protein sequence.

Analysis was performed using the ProtScale Tool selecting the “average area buried” amino acid scale (Gasteiger et al, 2005). Mutated regions in MPN304 are indicated in the plot.

**(C)** Protein stability assessment of MPN304 N-terminal FLAG-tagged derivatives containing single or combined mutations in putative Lon degrons. MPN304 mutant derivatives were expressed in the

$\Delta$ IndLon mutant and protein levels determined by immunoblot using anti-Lon and anti-FLAG antibodies comparing inducing (+) or depleting (–) conditions (48h of depletion). LC, loading control. We searched for sequence motifs in MPN304 with a high score for buried surface-area, as these regions have been shown to correlate well in *E. coli* with Lon-dependent degradation (Gur & Sauer, 2008). Although the C-terminal region of MPN304 has the highest score for buried surface-area of the protein and contains several motifs enriched in hydrophobic residues, only mutations in LPLMF located at the protein C-terminal end had a modest contribution in the stability of the protein (Appendix Figure S11C). The combination of mutated motifs in the C-terminal region did not further improve protein stability (Appendix Figure S11D), suggesting the existence of multiple exposed degrons.

Gasteiger E., Hoogland C., Gattiker A., Duvaud S., Wilkins M.R., Appel R.D., Bairoch A.; *Protein Identification and Analysis Tools on the ExPASy Server*; (In) John M. Walker (ed): The Proteomics Protocols Handbook, Humana Press (2005). pp. 571-607

Gur E & Sauer RT (2008) Recognition of misfolded proteins by Lon, a AAA protease. *Genes & Development* **22**: 2267–2277  
Available at: <http://dx.doi.org/10.1101/gad.1670908>

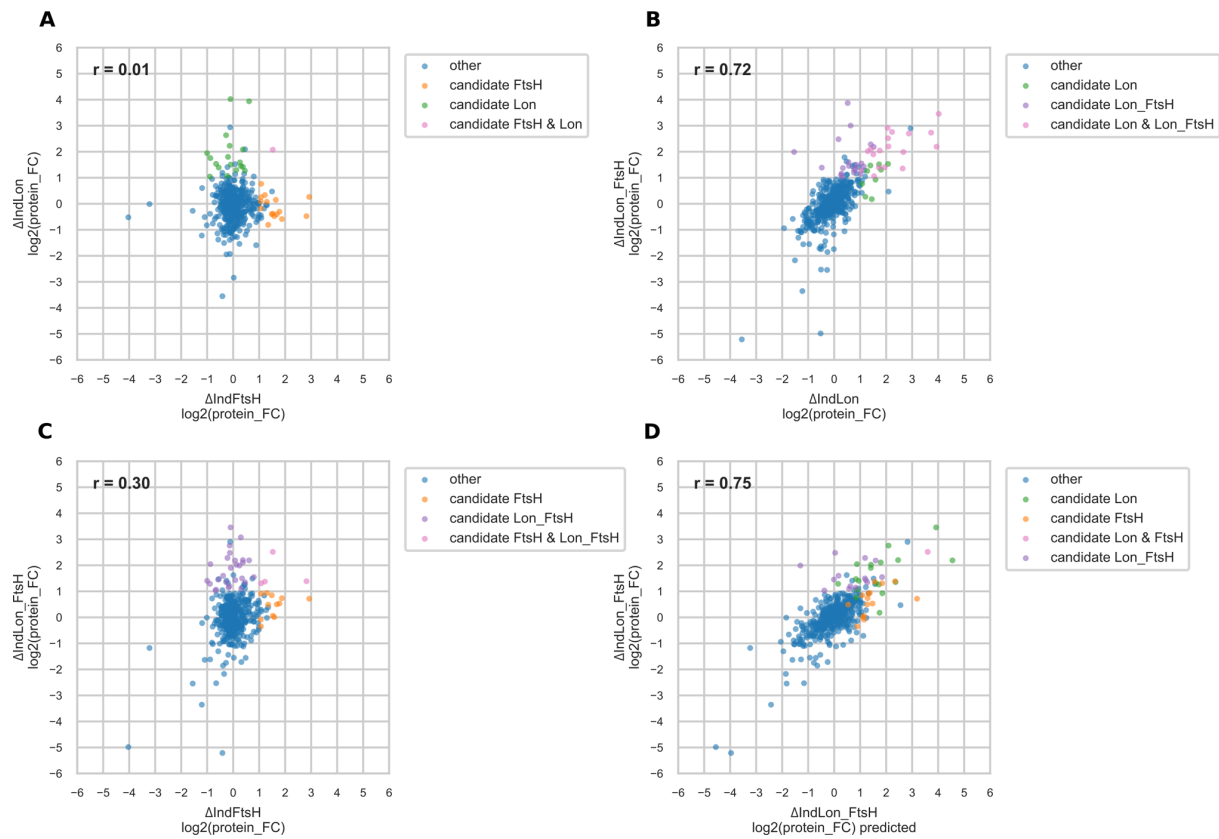

**Appendix Figure S12. Correlation between proteome changes in responses to Lon and FtsH depletions.** Correlation analysis of protein level changes comparing different mutant backgrounds. Data is reported as  $\log_2$  of protein fold changes observed after Lon and/or FtsH depletion (48h and 72h of depletion, respectively). **(A)**  $\Delta\text{IndLon}$  v.s.  $\Delta\text{IndFtsH}$ , **(B)**  $\Delta\text{IndLon}$  v.s.  $\Delta\text{IndLon\_FtsH}$ , **(C)**  $\Delta\text{IndFtsH}$  v.s.  $\Delta\text{IndLon\_FtsH}$ , **(D)**  $\Delta\text{IndLon\_FtsH\_predicted}$  v.s.  $\Delta\text{IndLon\_FtsH}$ . The predicted changes in the double mutant (referred to as  $\Delta\text{IndLon\_FtsH\_predicted}$ ) were computed as the sum of the  $\log_2$  (protein\_FC) in the two individual mutant experiments. Insets indicate pearson correlation coefficients.

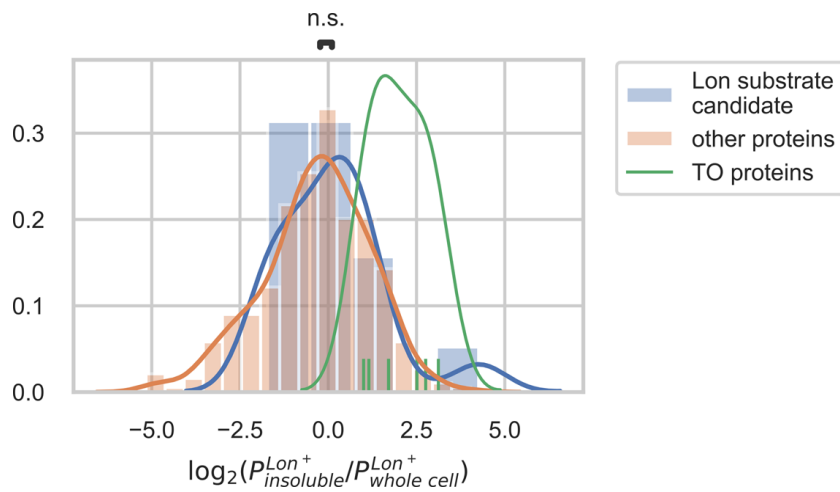

**Appendix Figure S13.** MS analysis showing the distribution of  $\log_2$  fold-changes of the Triton X-100 insoluble fraction compared to the whole cell lysate, under Lon inducing conditions. Proteins associated with the terminal organelle (TO proteins), known to be enriched in the insoluble fractions, are shown as reference. No significant difference in  $\log_2$  fold-changes for Lon substrate candidates was observed compared to the other proteins (Mann-Whitney-Wilcoxon two-sided test,  $p=0.08$ ).

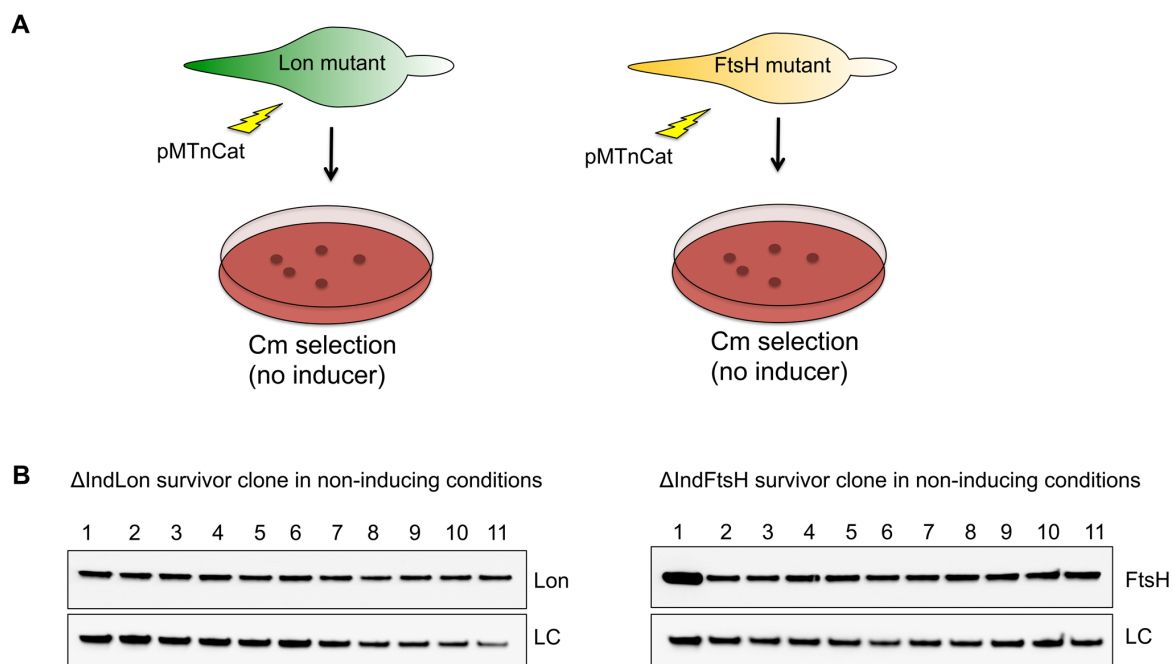

**Appendix Figure S14. Transposon mutagenesis screening to identify putative gene mutations suppressing lethality associated with Lon and FtsH depletion.**

(A). Schematic representation showing the screening strategy. Lon and FtsH conditional mutants in which the *cat* resistance gene was excised by the Cre-lox system were electroporated with the pMTnCat minitransposon. The resulting transformants were plated on Hayflick agar plates and selected in the absence of inducer and 20  $\mu$ g/ml Cm. In these selecting conditions, only transformants having transposon insertions in genes that could cause the lethality of Lon or FtsH depletion, or with mutations that derepress the inducible system are expected in principle to be selected. Of note, this screening strategy has the limitation that the effect of essential genes cannot be evaluated. A total of 11 and approximately 100 colonies were obtained after two independent transformation experiments for the Lon and FtsH conditional mutants, respectively. (B) Western blot analysis assessing the expression of Lon and FtsH in 11 survivor clones from each conditional mutant revealed that all clones were capable to express Lon and FtsH, suggesting the presence of mutations affecting the repressing capabilities of the inducible system. LC, loading control.

**Appendix Table S1.** Mycoplasma strains used in this study.

| Strain                             | Resistance                                            | Reference                          |
|------------------------------------|-------------------------------------------------------|------------------------------------|
| M129_GP35                          | Puro <sup>R</sup>                                     | Piñero-Lambea <i>et al.</i> , 2020 |
| ΔIndLon                            | Puro <sup>R</sup> , Cm <sup>R</sup>                   | This study                         |
| ΔIndLon_cat-                       | Puro <sup>R</sup> , Cm <sup>R</sup>                   | This study                         |
| M129_GP35_pMTnTc_ftsH_Ind          | Puro <sup>R</sup> , Tc <sup>R</sup>                   | This study                         |
| ΔIndFtsH                           | Puro <sup>R</sup> , Cm <sup>R</sup> , Tc <sup>R</sup> | This study                         |
| ΔIndFtsH_cat-                      | Puro <sup>R</sup> , Tc <sup>R</sup>                   | This study                         |
| ΔIndLon_FtsH                       | Puro <sup>R</sup> , Cm <sup>R</sup> , Tc <sup>R</sup> | This study                         |
| ΔIndLon_Δhmw2Nt                    | Puro <sup>R</sup> , Cm <sup>R</sup>                   | This study                         |
| ΔIndFtsH_pMTnCat_FLAG_MPN152       | Puro <sup>R</sup> , Cm <sup>R</sup> , Tc <sup>R</sup> | This study                         |
| ΔIndFtsH_pMTnCat_MPN152_FLAG       | Puro <sup>R</sup> , Cm <sup>R</sup> , Tc <sup>R</sup> | This study                         |
| ΔIndFtsH_pMTnCat_FLAG_MPN207a      | Puro <sup>R</sup> , Cm <sup>R</sup> , Tc <sup>R</sup> | This study                         |
| ΔIndFtsH_pMTnCat_MPN207a_FLAG      | Puro <sup>R</sup> , Cm <sup>R</sup> , Tc <sup>R</sup> | This study                         |
| ΔIndFtsH_pMTnCat_FLAG_MPN224       | Puro <sup>R</sup> , Cm <sup>R</sup> , Tc <sup>R</sup> | This study                         |
| ΔIndFtsH_pMTnCat_MPN224_FLAG       | Puro <sup>R</sup> , Cm <sup>R</sup> , Tc <sup>R</sup> | This study                         |
| ΔIndFtsH_pMTnCat_FLAG_MPN308       | Puro <sup>R</sup> , Cm <sup>R</sup> , Tc <sup>R</sup> | This study                         |
| ΔIndFtsH_pMTnCat_MPN308_FLAG       | Puro <sup>R</sup> , Cm <sup>R</sup> , Tc <sup>R</sup> | This study                         |
| ΔIndFtsH_pMTnCat_FLAG_MPN449       | Puro <sup>R</sup> , Cm <sup>R</sup> , Tc <sup>R</sup> | This study                         |
| ΔIndFtsH_pMTnCat_MPN449_FLAG       | Puro <sup>R</sup> , Cm <sup>R</sup> , Tc <sup>R</sup> | This study                         |
| ΔIndFtsH_pMTnCat_FLAG_MPN527       | Puro <sup>R</sup> , Cm <sup>R</sup> , Tc <sup>R</sup> | This study                         |
| ΔIndFtsH_pMTnCat_MPN527_FLAG       | Puro <sup>R</sup> , Cm <sup>R</sup> , Tc <sup>R</sup> | This study                         |
| ΔIndLon_pMTnTc_FLAG_MPN201         | Puro <sup>R</sup> , Cm <sup>R</sup> , Tc <sup>R</sup> | This study                         |
| ΔIndLon_pMTnTc_MPN201_FLAG         | Puro <sup>R</sup> , Cm <sup>R</sup> , Tc <sup>R</sup> | This study                         |
| ΔIndLon_pMTnTc_FLAG_MPN304         | Puro <sup>R</sup> , Cm <sup>R</sup> , Tc <sup>R</sup> | This study                         |
| ΔIndLon_pMTnTc_MPN304_FLAG         | Puro <sup>R</sup> , Cm <sup>R</sup> , Tc <sup>R</sup> | This study                         |
| ΔIndLon_pMTnTc_FLAG_MPN316         | Puro <sup>R</sup> , Cm <sup>R</sup> , Tc <sup>R</sup> | This study                         |
| ΔIndLon_pMTnTc_MPN316_FLAG         | Puro <sup>R</sup> , Cm <sup>R</sup> , Tc <sup>R</sup> | This study                         |
| ΔIndLon_pMTnTc_FLAG_MPN317         | Puro <sup>R</sup> , Cm <sup>R</sup> , Tc <sup>R</sup> | This study                         |
| ΔIndLon_pMTnTc_MPN317_FLAG         | Puro <sup>R</sup> , Cm <sup>R</sup> , Tc <sup>R</sup> | This study                         |
| ΔIndLon_pMTnTc_FLAG_MPN525         | Puro <sup>R</sup> , Cm <sup>R</sup> , Tc <sup>R</sup> | This study                         |
| ΔIndLon_pMTnTc_MPN525_FLAG         | Puro <sup>R</sup> , Cm <sup>R</sup> , Tc <sup>R</sup> | This study                         |
| ΔIndLon_pMTnTc_FLAG_MPN638         | Puro <sup>R</sup> , Cm <sup>R</sup> , Tc <sup>R</sup> | This study                         |
| ΔIndLon_pMTnTc_MPN638_FLAG         | Puro <sup>R</sup> , Cm <sup>R</sup> , Tc <sup>R</sup> | This study                         |
| ΔIndLon_pMTnTc_FLAG_MPN201mut1     | Puro <sup>R</sup> , Cm <sup>R</sup> , Tc <sup>R</sup> | This study                         |
| ΔIndLon_pMTnTc_MPN201_FLAGmut2     | Puro <sup>R</sup> , Cm <sup>R</sup> , Tc <sup>R</sup> | This study                         |
| ΔIndLon_pMTnTc_MPN201_FLAGmut3     | Puro <sup>R</sup> , Cm <sup>R</sup> , Tc <sup>R</sup> | This study                         |
| ΔIndLon_pMTnTc_MPN201_FLAGmut4     | Puro <sup>R</sup> , Cm <sup>R</sup> , Tc <sup>R</sup> | This study                         |
| ΔIndLon_pMTnTc_FLAG_MPN304mut1     | Puro <sup>R</sup> , Cm <sup>R</sup> , Tc <sup>R</sup> | This study                         |
| ΔIndLon_pMTnTc_FLAG_MPN304mut2     | Puro <sup>R</sup> , Cm <sup>R</sup> , Tc <sup>R</sup> | This study                         |
| ΔIndLon_pMTnTc_FLAG_MPN304mut3     | Puro <sup>R</sup> , Cm <sup>R</sup> , Tc <sup>R</sup> | This study                         |
| ΔIndLon_pMTnTc_FLAG_MPN304mut1.2   | Puro <sup>R</sup> , Cm <sup>R</sup> , Tc <sup>R</sup> | This study                         |
| ΔIndLon_pMTnTc_FLAG_MPN304mut1.3   | Puro <sup>R</sup> , Cm <sup>R</sup> , Tc <sup>R</sup> | This study                         |
| ΔIndLon_pMTnTc_FLAG_MPN304mut2.3   | Puro <sup>R</sup> , Cm <sup>R</sup> , Tc <sup>R</sup> | This study                         |
| ΔIndLon_pMTnTc_FLAG_MPN304mut1.2.3 | Puro <sup>R</sup> , Cm <sup>R</sup> , Tc <sup>R</sup> | This study                         |
| ΔIndLon_pMTnTc_FLAG_MPN316mut1     | Puro <sup>R</sup> , Cm <sup>R</sup> , Tc <sup>R</sup> | This study                         |
| ΔIndLon_pMTnTc_FLAG_MPN316mut2     | Puro <sup>R</sup> , Cm <sup>R</sup> , Tc <sup>R</sup> | This study                         |
| ΔIndLon_pMTnTc_FLAG_MPN316_L413D   | Puro <sup>R</sup> , Cm <sup>R</sup> , Tc <sup>R</sup> | This study                         |
| ΔIndLon_pMTnTc_FLAG_MPN316_V414G   | Puro <sup>R</sup> , Cm <sup>R</sup> , Tc <sup>R</sup> | This study                         |
| ΔIndLon_pMTnTc_FLAG_MPN316_L417D   | Puro <sup>R</sup> , Cm <sup>R</sup> , Tc <sup>R</sup> | This study                         |
| ΔIndLon_pMTnTc_FLAG_MPN316_I418G   | Puro <sup>R</sup> , Cm <sup>R</sup> , Tc <sup>R</sup> | This study                         |
| ΔIndLon_pMTnTc_FLAG_MPN317mut1     | Puro <sup>R</sup> , Cm <sup>R</sup> , Tc <sup>R</sup> | This study                         |
| ΔIndLon_pMTnTc_FLAG_MPN317mut2     | Puro <sup>R</sup> , Cm <sup>R</sup> , Tc <sup>R</sup> | This study                         |
| ΔIndLon_pMTnTc_FLAG_MPN317_F378D   | Puro <sup>R</sup> , Cm <sup>R</sup> , Tc <sup>R</sup> | This study                         |
| ΔIndLon_pMTnTc_FLAG_MPN317_Y380G   | Puro <sup>R</sup> , Cm <sup>R</sup> , Tc <sup>R</sup> | This study                         |
| ΔIndLon_pMTnTc_FLAG_MPN525mut1     | Puro <sup>R</sup> , Cm <sup>R</sup> , Tc <sup>R</sup> | This study                         |
| ΔIndLon_pMTnTc_FLAG_MPN525_V391G   | Puro <sup>R</sup> , Cm <sup>R</sup> , Tc <sup>R</sup> | This study                         |
| ΔIndLon_pMTnTc_FLAG_MPN525_Y393D   | Puro <sup>R</sup> , Cm <sup>R</sup> , Tc <sup>R</sup> | This study                         |
| ΔIndLon_pMTnTc_FLAG_MPN525_F394G   | Puro <sup>R</sup> , Cm <sup>R</sup> , Tc <sup>R</sup> | This study                         |
| ΔIndLon_pMTnTc_FLAG_MPN638CtMPN201 | Puro <sup>R</sup> , Cm <sup>R</sup> , Tc <sup>R</sup> | This study                         |
| ΔIndLon_pMTnTc_luc2_F89E           | Puro <sup>R</sup> , Cm <sup>R</sup> , Tc <sup>R</sup> | This study                         |

Piñero-Lambea C, Garcia-Ramallo E, Martinez S, Delgado J, Serrano L & Lluch-Senar M (2020) Genome Editing Based on Oligo Recombineering and Cas9-Mediated Counterselection. *ACS Synth. Biol.* **9**: 1693–1704.

**Appendix Table S2.** Gibson cloning strategy for each plasmid constructed in this study.

| <b>Gibson component</b>                                                                          | <b>Primers</b>                    | <b>Template</b>                                  | <b>Gibson assembly</b> |
|--------------------------------------------------------------------------------------------------|-----------------------------------|--------------------------------------------------|------------------------|
| <i>pΔLonPr_Ind</i>                                                                               |                                   |                                                  |                        |
| PCR1                                                                                             | p_LA_Lon_F / ter_LA_LonR          | gDNA M129                                        | x                      |
| PCR2                                                                                             | ter_lox66_F / tetR_lox71_R        | pMTnCat(lox) <sup>(1)</sup>                      | x                      |
| PCR3                                                                                             | lox71_tetR_F / RALonIndPr_R       | pMTnParGP35eiCas9_eNT2 <sup>(2)</sup>            | x                      |
| PCR4                                                                                             | IndPr_RALon_F / p_RALon_R         | gDNA M129                                        | x                      |
| Vector                                                                                           |                                   | pBSK <i>EcoRV</i> digested                       | x                      |
| <i>pMTnTc_ftsH_Ind</i>                                                                           |                                   |                                                  |                        |
| PCR1                                                                                             | ter625_TetR_F / ftsH_IndPr_R      | pΔLonPr_Ind <sup>(3)</sup>                       |                        |
| PCR2                                                                                             | p_ter625_F / ftsH_IndPr_R         | PCR1                                             | x                      |
| PCR3                                                                                             | IndPr_LAFtsH_R / p_ftsH_R         | gDNA M129                                        | x                      |
| Vector                                                                                           |                                   | pMTnTetM438 <i>EcoRV</i> digested <sup>(4)</sup> | x                      |
| <i>pΔFtsH</i>                                                                                    |                                   |                                                  |                        |
| PCR1                                                                                             | p_LA_ftsH_F / P438_LA_ftsH_R      | gDNA M129                                        | x                      |
| PCR2                                                                                             | P438_lox66_F / RA_ftsH_lox71_R    | pMTnCat(lox) <sup>(1)</sup>                      | x                      |
| PCR3                                                                                             | lox71_RA_ftsH_F / p_RA_ftsH_R     | gDNA M129                                        | x                      |
| Vector                                                                                           |                                   | pBSK <i>EcoRV</i> digested                       | x                      |
| <i>pΔNt-hmw2</i>                                                                                 |                                   |                                                  |                        |
| PCR1                                                                                             | p_LA_hmw2_F / LA_hmw2_R           | gDNA M129                                        | x                      |
| PCR2                                                                                             | LA_hmw2_lox71_F / RA_hmw2_lox66_R | pMTnCat(lox) <sup>(1)</sup>                      | x                      |
| PCR3                                                                                             | RA_hmw2_F / p_RA_hmw2_R           | gDNA M129                                        | x                      |
| Vector                                                                                           |                                   | pBSK <i>EcoRV</i> digested                       | x                      |
| <i>pMTnTc_luc2_F89E</i>                                                                          |                                   |                                                  |                        |
| PCR1                                                                                             | P438_luc2_F / luc2_F89E_R         | pMTnCat_luc2Ind_K <sup>(5)</sup>                 |                        |
| PCR2                                                                                             | p_P438_F / luc2_F89E_R            | PCR1                                             | x                      |
| PCR3                                                                                             | luc2_F89E_F / p_luc2_R2           | PCR1                                             | x                      |
| Vector                                                                                           |                                   | pMTnTetM438 <i>EcoRV</i> digested <sup>(4)</sup> | x                      |
| <i>N-terminal FLAG variants of FtsH substrates (XXX indicates the corresponding gene number)</i> |                                   |                                                  |                        |
| PCR1                                                                                             | FLAG_MPNXXX_F / p_MPNXXX_R        | gDNA M129                                        |                        |
| PCR2                                                                                             | p_P438FLAG_F / p_MPNXXX_R         | PCR 1                                            | x                      |
| Vector                                                                                           |                                   | pMTnCat <i>EcoRV</i> digested <sup>(6)</sup>     | x                      |
| <i>C-terminal FLAG variants of FtsH substrates (XXX indicates the corresponding gene number)</i> |                                   |                                                  |                        |
| PCR1                                                                                             | P438_MPNXXX_F / FLAG_MPNXXX_R     | gDNA M129                                        |                        |
| PCR2                                                                                             | p_P438_F / p_FLAG_Ct_R            | PCR 1                                            | x                      |
| Vector                                                                                           |                                   | pMTnCat <i>EcoRV</i> digested <sup>(6)</sup>     | x                      |
| <i>N-terminal FLAG variants of Lon substrates (XXX indicates the corresponding gene number)</i>  |                                   |                                                  |                        |
| PCR1                                                                                             | FLAG_MPNXXX_F / p_MPNXXX_R        | gDNA M129                                        |                        |
| PCR2                                                                                             | p_P438FLAG_F / p_MPNXXX_R         | PCR 1                                            | x                      |
| Vector                                                                                           |                                   | pMTnTetM438 <i>EcoRV</i> digested <sup>(4)</sup> | x                      |
| <i>C-terminal FLAG variants of Lon substrates (XXX indicates the corresponding gene number)</i>  |                                   |                                                  |                        |
| PCR1                                                                                             | P438_MPNXXX_F / FLAG_MPNXXX_R     | gDNA M129                                        |                        |
| PCR2                                                                                             | p_P438_F / p_FLAG_Ct_R            | PCR 1                                            | x                      |
| Vector                                                                                           |                                   | pMTnTetM438 <i>EcoRV</i> digested <sup>(4)</sup> | x                      |
| <i>N and C- terminal FLAG variants with mutated degrons</i>                                      |                                   |                                                  |                        |
| <i>pMTnTc_FLAG_MPN201mut1</i>                                                                    |                                   |                                                  |                        |
| PCR1                                                                                             | FLAG_MPN201_F / MPN201_Ct638_R    | <i>pMTnTc_FLAG_MPN201</i> <sup>(3)</sup>         |                        |
| PCR2                                                                                             | p_P438FLAG_F / p_MPN638_R         | PCR 1                                            | x                      |
| Vector                                                                                           |                                   | pMTnTetM438 <i>EcoRV</i> digested <sup>(4)</sup> | x                      |
| <i>pMTnTc_MPN201_FLAGmut2</i>                                                                    |                                   |                                                  |                        |
| PCR1                                                                                             | MPN201mut2_F / p_FLAG_Ct_R        | <i>pMTnTc_MPN201_FLAG</i> <sup>(3)</sup>         |                        |
| PCR2                                                                                             | P438_MPN201mut2_F / p_FLAG_Ct_R   | PCR1                                             |                        |
| PCR3                                                                                             | p_P438_F / p_FLAG_Ct_R            | PCR2                                             | x                      |
| Vector                                                                                           |                                   | pMTnTetM438 <i>EcoRV</i> digested <sup>(4)</sup> | x                      |



**Appendix Table S2.** Gibson cloning strategy (cont.).

| <b>Gibson component</b>           | <b>Primers</b>                  | <b>Template</b>                                  | <b>Gibson assembly</b> |
|-----------------------------------|---------------------------------|--------------------------------------------------|------------------------|
| <i>pMTnTc_MPN201_FLAGmut3</i>     |                                 |                                                  |                        |
| PCR1                              | p_P438_F / MPN201mut3_R         | <i>pMTnTc_MPN201_FLAG</i> <sup>(3)</sup>         | x                      |
| PCR2                              | MPN201mut3_F / p_FLAG_Ct_R      | <i>pMTnTc_MPN201_FLAG</i> <sup>(3)</sup>         | x                      |
| Vector                            |                                 | pMTnTetM438 <i>EcoRV</i> digested <sup>(4)</sup> | x                      |
| <i>pMTnTc_MPN201_FLAGmut4</i>     |                                 |                                                  |                        |
| PCR1                              | p_P438_F / MPN201mut4_R         | <i>pMTnTc_MPN201_FLAG</i> <sup>(3)</sup>         | x                      |
| PCR2                              | MPN201mut4_F / p_FLAG_Ct_R      | <i>pMTnTc_MPN201_FLAG</i> <sup>(3)</sup>         | x                      |
| Vector                            |                                 | pMTnTetM438 <i>EcoRV</i> digested <sup>(4)</sup> | x                      |
| <i>pMTnTc_FLAG_MPN304mut1</i>     |                                 |                                                  |                        |
| PCR1                              | p_P438FLAG_F / MPN304mut1_R     | <i>pMTnTc_FLAG_MPN304</i> <sup>(3)</sup>         | x                      |
| PCR2                              | MPN304mut1_F / p_MPN304_R       | <i>pMTnTc_FLAG_MPN304</i> <sup>(3)</sup>         | x                      |
| Vector                            |                                 | pMTnTetM438 <i>EcoRV</i> digested <sup>(4)</sup> | x                      |
| <i>pMTnTc_FLAG_MPN304mut2</i>     |                                 |                                                  |                        |
| PCR1                              | FLAG_MPN304_F / MPN304mut2_R    | <i>pMTnTc_FLAG_MPN304</i> <sup>(3)</sup>         |                        |
| PCR2                              | p_P438FLAG_F / p_MPN304_R       | PCR1                                             | x                      |
| Vector                            |                                 | pMTnTetM438 <i>EcoRV</i> digested <sup>(4)</sup> | x                      |
| <i>pMTnTc_FLAG_MPN304mut3</i>     |                                 |                                                  |                        |
| PCR1                              | p_P438FLAG_F / p_MPN304mut3_R   | <i>pMTnTc_FLAG_MPN304</i> <sup>(3)</sup>         | x                      |
| Vector                            |                                 | pMTnTetM438 <i>EcoRV</i> digested <sup>(4)</sup> | x                      |
| <i>pMTnTc_FLAG_MPN304mut1.2</i>   |                                 |                                                  |                        |
| PCR1                              | p_P438FLAG_F / MPN304mut1_R     | pMTnTc_FLAG_MPN304mut2 <sup>(3)</sup>            | x                      |
| PCR2                              | MPN304mut1_F / p_MPN304_R       | pMTnTc_FLAG_MPN304mut2 <sup>(3)</sup>            | x                      |
| Vector                            |                                 | pMTnTetM438 <i>EcoRV</i> digested <sup>(4)</sup> | x                      |
| <i>pMTnTc_FLAG_MPN304mut1.3</i>   |                                 |                                                  |                        |
| PCR1                              | p_P438FLAG_F / MPN304mut1_R     | <i>pMTnTc_FLAG_MPN304</i> <sup>(3)</sup>         | x                      |
| PCR2                              | MPN304mut1_F / p_MPN304mut3_R   | <i>pMTnTc_FLAG_MPN304</i> <sup>(3)</sup>         | x                      |
| Vector                            |                                 | pMTnTetM438 <i>EcoRV</i> digested <sup>(4)</sup> | x                      |
| <i>pMTnTc_FLAG_MPN304mut2.3</i>   |                                 |                                                  |                        |
| PCR1                              | p_P438FLAG_F / p_MPN304mut3_R   | pMTnTc_FLAG_MPN304mut2 <sup>(3)</sup>            | x                      |
| Vector                            |                                 | pMTnTetM438 <i>EcoRV</i> digested <sup>(4)</sup> | x                      |
| <i>pMTnTc_FLAG_MPN304mut1.2.3</i> |                                 |                                                  |                        |
| PCR1                              | p_P438FLAG_F / MPN304mut1_R     | pMTnTc_FLAG_MPN304mut2 <sup>(3)</sup>            | x                      |
| PCR2                              | MPN304mut1_F / p_MPN304mut3_R   | pMTnTc_FLAG_MPN304mut2 <sup>(3)</sup>            | x                      |
| Vector                            |                                 | pMTnTetM438 <i>EcoRV</i> digested <sup>(4)</sup> | x                      |
| <i>pMTnTc_FLAG_MPN316mut1</i>     |                                 |                                                  |                        |
| PCR1                              | FLAG_MPN316_F / MPN316mut1_R    | <i>pMTnTc_FLAG_MPN316</i> <sup>(3)</sup>         |                        |
| PCR2                              | p_P438FLAG_F / p_MPN316_R       | PCR1                                             | x                      |
| Vector                            |                                 | pMTnTetM438 <i>EcoRV</i> digested <sup>(4)</sup> | x                      |
| <i>pMTnTc_FLAG_MPN316mut2</i>     |                                 |                                                  |                        |
| PCR1                              | FLAG_MPN316_F / MPN316mut2_R    | <i>pMTnTc_FLAG_MPN316</i> <sup>(3)</sup>         |                        |
| PCR2                              | p_P438FLAG_F / p_MPN316mut2_R   | PCR1                                             | x                      |
| Vector                            |                                 | pMTnTetM438 <i>EcoRV</i> digested <sup>(4)</sup> | x                      |
| <i>pMTnTc_FLAG_MPN316_L413D</i>   |                                 |                                                  |                        |
| PCR1                              | p_P438FLAG_F / p_MPN316_L413D_R | <i>pMTnTc_FLAG_MPN316</i> <sup>(3)</sup>         | x                      |
| Vector                            |                                 | pMTnTetM438 <i>EcoRV</i> digested <sup>(4)</sup> | x                      |
| <i>pMTnTc_FLAG_MPN316_V414G</i>   |                                 |                                                  |                        |
| PCR1                              | p_P438FLAG_F / p_MPN316_V414G_R | <i>pMTnTc_FLAG_MPN316</i> <sup>(3)</sup>         | x                      |
| Vector                            |                                 | pMTnTetM438 <i>EcoRV</i> digested <sup>(4)</sup> | x                      |
| <i>pMTnTc_FLAG_MPN316_L417D</i>   |                                 |                                                  |                        |
| PCR1                              | p_P438FLAG_F / p_MPN316_L417D_R | <i>pMTnTc_FLAG_MPN316</i> <sup>(3)</sup>         | x                      |
| Vector                            |                                 | pMTnTetM438 <i>EcoRV</i> digested <sup>(4)</sup> | x                      |

**Appendix Table S2.** Gibson cloning strategy (cont.).

| <b>Gibson component</b>                                    | <b>Primers</b>                  | <b>Template</b>                                  | <b>Gibson assembly</b> |
|------------------------------------------------------------|---------------------------------|--------------------------------------------------|------------------------|
| <i>N and C-terminal FLAG variants with mutated degrons</i> |                                 |                                                  |                        |
| <i>pMTnTc_FLAG_MPN316_I418G</i>                            |                                 |                                                  |                        |
| PCR1                                                       | p_P438FLAG_F / p_MPN316_I418G_R | <i>pMTnTc_FLAG_MPN316</i> <sup>(3)</sup>         | x                      |
| Vector                                                     |                                 | pMTnTetM438 <i>EcoRV</i> digested <sup>(4)</sup> | x                      |
| <i>pMTnTc_FLAG_MPN317mut1</i>                              |                                 |                                                  |                        |
| PCR1                                                       | FLAG_MPN317_F / MPN317mut1_R    | <i>pMTnTc_FLAG_MPN317</i> <sup>(3)</sup>         |                        |
| PCR2                                                       | p_P438FLAG_F / p_MPN317_R       | PCR1                                             | x                      |
| Vector                                                     |                                 | pMTnTetM438 <i>EcoRV</i> digested <sup>(4)</sup> | x                      |
| <i>pMTnTc_FLAG_MPN317mut2</i>                              |                                 |                                                  |                        |
| PCR1                                                       | FLAG_MPN317_F / p_MPN317mut2_R  | <i>pMTnTc_FLAG_MPN317</i> <sup>(3)</sup>         |                        |
| PCR2                                                       | p_P438FLAG_F / p_MPN317mut2_R   | PCR1                                             | x                      |
| Vector                                                     |                                 | pMTnTetM438 <i>EcoRV</i> digested <sup>(4)</sup> | x                      |
| <i>pMTnTc_FLAG_MPN317_F378D</i>                            |                                 |                                                  |                        |
| PCR1                                                       | p_P438FLAG_F / p_MPN317_F378D_R | <i>pMTnTc_FLAG_MPN317</i> <sup>(3)</sup>         | x                      |
| Vector                                                     |                                 | pMTnTetM438 <i>EcoRV</i> digested <sup>(4)</sup> | x                      |
| <i>pMTnTc_FLAG_MPN317_Y380G</i>                            |                                 |                                                  |                        |
| PCR1                                                       | p_P438FLAG_F / p_MPN317_Y380_R  | <i>pMTnTc_FLAG_MPN317</i> <sup>(3)</sup>         | x                      |
| Vector                                                     |                                 | pMTnTetM438 <i>EcoRV</i> digested <sup>(4)</sup> | x                      |
| <i>pMTnTc_FLAG_MPN525mut1</i>                              |                                 |                                                  |                        |
| PCR1                                                       | FLAG_MPN525_F / MPN525mut1_R    | <i>pMTnTc_FLAG_MPN525</i> <sup>(3)</sup>         |                        |
| PCR2                                                       | p_P438FLAG_F / MPN525mut1_R     | PCR1                                             | x                      |
| PCR3                                                       | MPN525mut1_F / p_MPN525_R       | <i>pMTnTc_FLAG_MPN525</i> <sup>(3)</sup>         | x                      |
| Vector                                                     |                                 | pMTnTetM438 <i>EcoRV</i> digested <sup>(4)</sup> | x                      |
| <i>pMTnTc_FLAG_MPN525_V391G</i>                            |                                 |                                                  |                        |
| PCR1                                                       | FLAG_MPN525_F / MPN525_V391G_R  | <i>pMTnTc_FLAG_MPN525</i> <sup>(3)</sup>         |                        |
| PCR2                                                       | p_P438FLAG_F / MPN525_V391G_R   | PCR1                                             | x                      |
| PCR3                                                       | MPN525_V391G_F / p_MPN525_R     | <i>pMTnTc_FLAG_MPN525</i> <sup>(3)</sup>         | x                      |
| Vector                                                     |                                 | pMTnTetM438 <i>EcoRV</i> digested <sup>(4)</sup> | x                      |
| <i>pMTnTc_FLAG_MPN525_Y393D</i>                            |                                 |                                                  |                        |
| PCR1                                                       | FLAG_MPN525_F / MPN525_Y393D_R  | <i>pMTnTc_FLAG_MPN525</i> <sup>(3)</sup>         |                        |
| PCR2                                                       | p_P438FLAG_F / MPN525_Y393D_R   | PCR1                                             | x                      |
| PCR3                                                       | MPN525_Y393D_F / p_MPN525_R     | <i>pMTnTc_FLAG_MPN525</i> <sup>(3)</sup>         | x                      |
| Vector                                                     |                                 | pMTnTetM438 <i>EcoRV</i> digested <sup>(4)</sup> | x                      |
| <i>pMTnTc_FLAG_MPN525_F394G</i>                            |                                 |                                                  |                        |
| PCR1                                                       | FLAG_MPN525_F / MPN525_F394G_R  | <i>pMTnTc_FLAG_MPN525</i> <sup>(3)</sup>         |                        |
| PCR2                                                       | p_P438FLAG_F / MPN525_F394G_R   | PCR1                                             | x                      |
| PCR3                                                       | MPN525_F394G_F / p_MPN525_R     | <i>pMTnTc_FLAG_MPN525</i> <sup>(3)</sup>         | x                      |
| Vector                                                     |                                 | pMTnTetM438 <i>EcoRV</i> digested <sup>(4)</sup> | x                      |
| <i>pMTnTc_FLAG_MPN638CtMPN201</i>                          |                                 |                                                  |                        |
| PCR1                                                       | FLAG_MPN638_F / MPN638_Ct201_R  | <i>pMTnTc_FLAG_MPN638</i> <sup>(3)</sup>         |                        |
| PCR2                                                       | p_P438FLAG_F / p_MPN201_R       | PCR1                                             | x                      |
| Vector                                                     |                                 | pMTnTetM438 <i>EcoRV</i> digested <sup>(4)</sup> | x                      |

<sup>(1)</sup>In-house cloning vector containing the *cat* gene flanked by lox sites.

<sup>(2)</sup>Piñero-Lambea C, Garcia-Ramallo E, Martinez S, Delgado J, Serrano L & Lluch-Senar M (2020) Genome Editing Based on Oligo Recombineering and Cas9-Mediated Counterselection. *ACS Synth. Biol.* **9**: 1693–1704.

<sup>(3)</sup>This study.

- <sup>(4)</sup> Pich, O.Q., Burgos, R., Planell, R., Querol, E., and Piñol, J. (2006). Comparative analysis of antibiotic resistance gene markers in *Mycoplasma genitalium*: application to studies of the minimal gene complement. *Microbiology* 152, 519–527.
- <sup>(5)</sup> Weber M, Burgos R, Yus E, Yang J-S, Lluch-Senar M & Serrano L (2020) Impact of C-terminal amino acid composition on protein expression in bacteria. *Mol. Syst. Biol.* **16**: e9208
- <sup>(6)</sup> Burgos, R., Wood, G.E., Young, L., Glass, J.I., and Totten, P.A. (2012). RecA mediates MgpB and MgpC phase and antigenic variation in *Mycoplasma genitalium*, but plays a minor role in DNA repair. *Mol. Microbiol.* 85, 669–683.

**Appendix Table S3.** Primers used in this study.

| <b>Primer name</b>                                                     | <b>Sequence (5' to 3')<sup>a</sup></b>                     |
|------------------------------------------------------------------------|------------------------------------------------------------|
| <i>Construction of plasmids</i>                                        |                                                            |
| <b>pΔLonPr_Ind</b>                                                     |                                                            |
| p_LALon_F                                                              | ACGGTATCGATAAGCTTGATACTTACTTTTCATAAGTTAGTTTC               |
| ter_LALon_R                                                            | ATACCTGAAAGACTCAGGTATTTTTTTGAGTGCTAATGAGTGGAGTA            |
| ter_lox66_F                                                            | TACCTGAGTCTTTCAGGTATTTTTTTTACCCTTCGTATAGCATAC              |
| tetR_lox71_R                                                           | TGGGTCTTAATACCGTTCGTATAATGTATG                             |
| lox71_tetR_F                                                           | ACGAACGGTATTAAGACCCACTTTTCACATTTA                          |
| RALon_IndPr_R                                                          | CAGCTGGCATAATGCTCTATCAATGATAGAGGA                          |
| IndPr_RALon_F                                                          | GATAGAGCATATGCCAGCTGTAAAAAAACCA                            |
| p_RALon_R                                                              | CCGGGCTGCAGGAATTCGATTCTTTTGGTACCTTAGATAGC                  |
| <b>pMTnTc_ftsH_Ind</b>                                                 |                                                            |
| p_ter625_F                                                             | ACGGTATCGATAAGCTTGATAAAAAATACCTGAGTCTTTCAGGTATT            |
| ter625_TetR_F                                                          | TACCTGAGTCTTTCAGGTATTTTTTTTAAAGACCCACTTTTCACATTTA          |
| ftsH_IndPr_R                                                           | TTTTTTTCATATGCTCTATCAATGATAGAGG                            |
| IndPr_LAFtsH_R                                                         | GATAGAGCATATGAAAAAAATAAAGGACTTAACG                         |
| p_ftsH_R                                                               | TCTAAATACTAGAATTCGATTAACTGTTTGTTCACCTGTCT                  |
| <b>pΔFtsH</b>                                                          |                                                            |
| p_LA_ftsH_F                                                            | ACGGTATCGATAAGCTTGATCTTGTACTGCCTTTTGGTGC                   |
| P438_LA_ftsH_R                                                         | GTATTTAGAATTAATAAAGTGCAAGAACAGCAAGCCAAAC                   |
| P438_lox66_F                                                           | ACTTTATTAATCTAAATACTATACCGTTCGTATAGCATAC                   |
| RA_ftsH_lox71_R                                                        | ACTACGAGCGAAAAACCGCATACCGTTCGTATAATGTATG                   |
| lox71_RA_ftsH_F                                                        | TGCGGTTTTTCGCTCGTAGT                                       |
| p_RA_ftsH_R                                                            | CCGGGCTGCAGGAATTCGATCCTAAAGGCAAGGACATTCTT                  |
| <b>pΔNt-hmw2</b>                                                       |                                                            |
| p_LA_hmw2_F                                                            | ACGGTATCGATAAGCTTGATCGCCATCTTTTCGATGCGC                    |
| LA_hmw2_R                                                              | CGGTTAAAAAGAGCCAGTGT                                       |
| LA_hmw2_lox71_F                                                        | AACACTGGCTCTTTAACCGTACCGTTCGTATAATGTATG                    |
| RA_hmw2_lox66_R                                                        | CTGTTCTAAGTGTTTAGCAATACCGTTCGTATAGCATAC                    |
| RA_hmw2_F                                                              | TTGCTAAACACTAGAACAGCA                                      |
| p_RA_hmw2_R                                                            | CCGGGCTGCAGGAATTCGATGCTCAGCTTGGTACTGCCTT                   |
| <b>pMTnTc_luc2_F89E</b>                                                |                                                            |
| p_P438_F                                                               | ACGGTATCGATAAGCTTGATTAGTATTTAGAATTAATAAAGTATG              |
| luc2_F89E_R                                                            | ACACGGGCATTTGCAACTGCAAG                                    |
| P438_luc2_F                                                            | TAGTATTTAGAATTAATAAAGTATGGAAGATGCCAAAAACATTA               |
| luc2_F89E_F                                                            | CTTGCAAGTTCGAAATGCCCGTGT                                   |
| p_luc2_R2                                                              | TCTAAATACTAGAATTCGATTACACGGCGATCTTGCCG                     |
| <i>Production of ssDNA recombineering substrates and PCR screening</i> |                                                            |
| Bio_lonPr_F                                                            | [biotin]ACTTACTTTCATAAGTTAGTTTC                            |
| Pro_lonPr_R                                                            | T*C*T*T*T*TTGGTACCTTAGATAGC                                |
| Pro_KOftsH_F                                                           | C*T*T*G*TACTGCCTTTTGGTGC                                   |
| Bio_KOftsH_R                                                           | [biotin]CCTAAAGGCAAGGACATTCTT                              |
| Pro_KOhmw2_R                                                           | G*T*C*A*GCTTGGTACTGCCTT                                    |
| Bio_KOhmw2_F                                                           | [biotin]CGCCATCTTTTCGATGCGC                                |
| <i>Construction of N- and C-terminal FLAG variants</i>                 |                                                            |
| p_P438_F                                                               | ACGGTATCGATAAGCTTGATTAGTATTTAGAATTAATAAAGTATG              |
| p_FLAG_Ct_R                                                            | TCTAAATACTAGAATTCGATTATTTGTCATCATCGTCCTTGTAGTC             |
| p_P438FLAG_F                                                           | ACGGTATCGATAAGCTTGATTAGTATTTAGAATTAATAAAGTATGGACTACAAGG    |
| FLAG_MPN152_F                                                          | AATAAAGTATGGACTACAAGGACGATGATGACAAAAATTTAAGTACGGCGCTATT    |
| p_MPN152_R                                                             | TCTAAATACTAGAATTCGATCTATCCATCACGGAAACGA                    |
| P438_MPN152_F                                                          | TAGTATTTAGAATTAATAAAGTATGAAATTTAAGTACGGCGCT                |
| FLAG_MPN152_R                                                          | TCATCATCGTCCTTGTAGTCTCCATCACGGAAACGACC                     |
| FLAG_MPN207a_F                                                         | AATAAAGTATGGACTACAAGGACGATGATGACAAACGAAAAGGTTGTATACGCATG   |
| p_MPN207a_R                                                            | TCTAAATACTAGAATTCGATTACTTAAACATTGAGGGAATG                  |
| P438_MPN207a_F                                                         | TAGTATTTAGAATTAATAAAGTATGCAAAAAGGTTGTATACGC                |
| FLAG_MPN207a_R                                                         | TCATCATCGTCCTTGTAGTCTTAAACATTGAGGGAATGGA                   |
| FLAG_MPN224_F                                                          | AATAAAGTATGGACTACAAGGACGATGATGACAAAAATCCTAGTGTAGTAGCAG     |
| p_MPN224_R                                                             | TCTAAATACTAGAATTCGATCTAAGCTTCCGGCACTGC                     |
| P438_MPN224_F                                                          | TAGTATTTAGAATTAATAAAGTATGAATCCTAGTGTAGTAGC                 |
| FLAG_MPN224_R                                                          | TCATCATCGTCCTTGTAGTACAGTTCGGCACTGCTTC                      |
| FLAG_MPN308_F                                                          | AATAAAGTATGGACTACAAGGACGATGATGACAAAAACAACAAAAACCCAAAAATTAG |
| p_MPN308_R                                                             | TCTAAATACTAGAATTCGATTAAACCGTTAATGGTGGAGT                   |
| P438_MPN308_F                                                          | TAGTATTTAGAATTAATAAAGTATGAAACAACAAAAACCCAAA                |
| FLAG_MPN308_R                                                          | TCATCATCGTCCTTGTAGTACCGTTAATGGTGGAGT                       |
| FLAG_MPN449_F                                                          | AATAAAGTATGGACTACAAGGACGATGATGACAAAACCTTTAGCGATCTTTTAACCA  |
| p_MPN449_R                                                             | TCTAAATACTAGAATTCGATTACCCAAAAACAGCTGGGG                    |
| P438_MPN449_F                                                          | TAGTATTTAGAATTAATAAAGTATGACTTTTACGGATCTTTTAAC              |
| FLAG_MPN449_R                                                          | TCATCATCGTCCTTGTAGTCCCAAAAAACAGCTGGGGT                     |
| FLAG_MPN527_F                                                          | AATAAAGTATGGACTACAAGGACGATGATGACAAAATGGTGCAAGAATAGCTTT     |
| p_MPN527_R                                                             | TCTAAATACTAGAATTCGATTAAATAGACAATCTGCGCTTTC                 |
| P438_MPN527_F                                                          | TAGTATTTAGAATTAATAAAGTATGAATGGTGCAAGAATAGC                 |
| FLAG_MPN527_R                                                          | TCATCATCGTCCTTGTAGTCATAGACAATCTGCGCTTTC                    |

**Appendix Table S3.** Primers used in this study (cont.).

| <b>Primer name</b>                                                          | <b>Sequence (5' to 3')<sup>a</sup></b>                                               |
|-----------------------------------------------------------------------------|--------------------------------------------------------------------------------------|
| <i>Construction of N- and C-terminal FLAG variants (cont.)</i>              |                                                                                      |
| FLAG_MPN201_F                                                               | AATAAAGTATGGACTACAAGGACGATGATGACAAAAGAGATTA <u>AAAACTTACAAAATCA</u>                  |
| p_MPN201_R                                                                  | TCTAAATACTAGAATTCGATCTAATTTCTTATTTTTGAACTCAATTA <u>AAATAAGAAG</u>                    |
| P438_MPN201_F                                                               | TAGTATTTAGAATTAATAAAGTATGGAGATTA <u>AAAACTTACAAAATC</u>                              |
| FLAG_MPN201_R                                                               | TCATCATCGTCCTTGTAGTCATTTCTTATTTTTGAACTCAATT                                          |
| FLAG_MPN304_F                                                               | AATAAAGTATGGACTACAAGGACGATGATGACAAAAAGTACAACATCAACGTTCA <u>T</u>                     |
| p_MPN304_R                                                                  | TCTAAATACTAGAATTCGATCTAAAACATTAATGGCAGCTTC                                           |
| P438_MPN304_F                                                               | TAGTATTTAGAATTAATAAAGTATGAAGTACAACATCAACGTT <u>C</u>                                 |
| FLAG_MPN304_R                                                               | TCATCATCGTCCTTGTAGTCAAAACATTAATGGCAGCTTCG                                            |
| FLAG_MPN316_F                                                               | AATAAAGTATGGACTACAAGGACGATGATGACAAAATATAACCTCA <u>AAAAACATCTACG</u>                  |
| p_MPN316_R                                                                  | TCTAAATACTAGAATTCGATTTACTTTATTAGTTTTTGCACTA                                          |
| P438_MPN316_F                                                               | TAGTATTTAGAATTAATAAAGTATGTATAACCTCA <u>AAAAACATCTAC</u>                              |
| FLAG_MPN316_R                                                               | TCATCATCGTCCTTGTAGTCTTTATTAGTTTTTGCACTAACT                                           |
| FLAG_MPN317_F                                                               | AATAAAGTATGGACTACAAGGACGATGATGACAAAAGATTGAATACA <u>AAACAGCAGG</u>                    |
| p_MPN317_R                                                                  | TCTAAATACTAGAATTCGATCTAATAATTAATCCGGTTTGC                                            |
| P438_MPN317_F                                                               | TAGTATTTAGAATTAATAAAGTATGGATTGAATACA <u>AAACAGCA</u>                                 |
| FLAG_MPN317_R                                                               | TCATCATCGTCCTTGTAGTCATAATTAATCCGGTTTGTCTG                                            |
| FLAG_MPN525_F                                                               | AATAAAGTATGGACTACAAGGACGATGATGACAAAACAGCCGA <u>AACTATTACCGTG</u>                     |
| p_MPN525_R                                                                  | TCTAAATACTAGAATTCGATTTAGCGTTTGTGTTTTCCATT                                            |
| P438_MPN525_F                                                               | TAGTATTTAGAATTAATAAAGTATGCAGCCGA <u>AACTATTACC</u>                                   |
| FLAG_MPN525_R                                                               | TCATCATCGTCCTTGTAGTCGCGTTTGTGTTTTCCATTTC                                             |
| FLAG_MPN638_F                                                               | AATAAAGTATGGACTACAAGGACGATGATGACAAAACCTCAA <u>AAATTAAGCTTAACA</u>                    |
| p_MPN638_R                                                                  | TCTAAATACTAGAATTCGATTTAAGATAGTGTGGGAACAATTTG <u>CCCCAA</u>                           |
| P438_MPN638_F                                                               | TAGTATTTAGAATTAATAAAGTATGACTCCTAAATTA <u>AGCTTAA</u>                                 |
| FLAG_MPN638_R                                                               | TCATCATCGTCCTTGTAGTCAGATAGTGTGGGAACAATTTG                                            |
| <i>Construction of N- and C-terminal FLAG variants with mutated degrons</i> |                                                                                      |
| MPN201_Ct638_R                                                              | TTGGGAACAATTTGCCAATAAGTTATCGCGAATACTATCCAATTGCTTTTACGCA                              |
| MPN201mut2_F                                                                | <i>GGCAAAACTGACAAAGGCAAAGATGGCTGTGATGGCACACGCGGTAGAGTTATC</i>                        |
| P438_MPN201mut2_F                                                           | TAGTATTTAGAATTAATAAAGTATGGAGGGCAA <u>AACTGACAAAGGC</u>                               |
| MPN201mut3_R                                                                | CGAGCCATCAGGGCCA <u>7CTCCTGGATCTTTTTAATGTC</u>                                       |
| MPN201mut3_F                                                                | GAGATGGCCCTGATGGCTCGGCAGCTACTAATAACGA                                                |
| MPN201mut4_R                                                                | TACCATCTTACCATCGCCGTCACCCAGAATTTATTCCGACCAAACT                                       |
| MPN201mut4_F                                                                | CGGCGATGGTGAAGATGGTACTGATACAGCTGACGGTTATGG                                           |
| MPN304mut1_R                                                                | ATATCCCCATCTATCCCGTCCCTCAATTGTGCCCATGT                                               |
| MPN304mut1_F                                                                | GACGGGATAGATGGGGATATGACCAACAACAG                                                     |
| MPN304mut2_R                                                                | AAACATTAATGGCAGCTTCGGTTGTCCGTTCCCGTCACC <u>GTCTCCGTCCTGTTG</u>                       |
| p_MPN304mut3_R                                                              | TCTAAATACTAGAATTCGATCTAATCCCGTCTGGGTCTTCGGTTGTC <u>CCGTTG</u>                        |
| MPN316mut1_R                                                                | CITTATTAGTTTTTGCACTAACTTATTAATGTGCGTGTGATCCTTGC <u>ATCGCCATCCGACT</u><br>TTTTAAACTGC |
| MPN316mut2_R                                                                | GCCATCTTTTTGGCCATCCTTATTAATGTGCGTGTGAC                                               |
| p_MPN316mut2_R                                                              | TCTAAATACTAGAATTCGATTTACTTTGCCATCTTTTTGGCCATCC                                       |
| p_MPN316_L413D_R                                                            | TCTAAATACTAGAATTCGATTTACTTTATTAGTTTTTGCACTCCTTATTAATGT                               |
| p_MPN316_V414G_R                                                            | TCTAAATACTAGAATTCGATTTACTTTATTAGTTTTTTGGCCTAACTTATTAATGT                             |
| p_MPN316_L417D_R                                                            | TCTAAATACTAGAATTCGATTTACTTTATAATCTTTTTTGCACTAACTTATTAATGT                            |
| p_MPN316_I418G_R                                                            | TCTAAATACTAGAATTCGATTTACTTTGCTAGTTTTTTGCACTAACTTATTAATGT                             |
| MPN317mut1_R                                                                | CTAATAATTAATCCGGTTTGTGTTGGCCTCTTTGCCATCTTTGCCATCTCCTTTAAATC                          |
| p_MPN317mut2_R                                                              | TCTAAATACTAGAATTCGATCTAGCCATTAATCCTCGGTTTGTGTTT                                      |
| p_MPN317_F378D_R                                                            | TCTAAATACTAGAATTCGATCTAATAATTAATCCTCGGTTTGTGTTT                                      |
| p_MPN317_Y380G_R                                                            | TCTAAATACTAGAATTCGATCTAGCCATTAATAATCCGGTTTGTGTTT                                     |
| MPN525mut1_F                                                                | CTGATGACGGCAATGACGGTTTAAACCGT                                                        |
| MPN525mut1_R                                                                | ACGGTTTAAACCGTCATGCCGTCATCAG                                                         |
| MPN525_V391G_F                                                              | CTGATGACGGCAATTACTTTTTAAACCGT                                                        |
| MPN525_V391G_R                                                              | ACGGTTTAAAAAGTAATTGCCGTCATCAG                                                        |
| MPN525_Y393D_F                                                              | CTGATGACGTCATGACTTTTTAAACCGT                                                         |
| MPN525_Y393D_R                                                              | ACGGTTTAAAAAGTCATGACGTCATCAG                                                         |
| MPN525_F394G_F                                                              | CTGATGACGTCATTAACGGTTTAAACCGT                                                        |
| MPN525_F394G_R                                                              | ACGGTTTAAACCGTAATTGACGTCATCAG                                                        |
| MPN638_Ct201_R                                                              | TTGAACTCAATTAATAAGAAGTCTGATAGTAGATTAAGACTTAGCTTCTTC                                  |

<sup>a</sup> The underlined sequences indicate the priming sequences. Depending on the primer, the remaining sequence of the primer was designed to introduce promoter and terminator sequences, mutations (in italic bases) or overlapping sequences for Gibson assembly.
